## **A Cell Atlas of Microbe-Responsive Processes in the Zebrafish Intestine**

Reegan J. Willms<sup>1</sup>, Lena Ocampo Jones<sup>1</sup>, Jennifer C. Hocking<sup>2</sup> and Edan Foley<sup>1\*</sup>.

1: Department of Medical Microbiology and Immunology, Faculty of Medicine and Dentistry, University of Alberta, Edmonton, AB, Canada

2: Division of Anatomy, Department of Surgery, Faculty of Medicine and Dentistry, University of Alberta, Edmonton, AB, Canada

\*Corresponding Author: [efoley@ualberta.ca](mailto:efoley@ualberta.ca)

1 **ABSTRACT**

2 Gut microbial products direct growth, differentiation, and development in the animal host. Disruptions to  
3 host-microbe interactions have profound health consequences, that include onset of chronic  
4 inflammatory illnesses. However, we lack system-wide understanding of cell-specific responses to the  
5 microbiome. We profiled transcriptional activity in individual cells from the intestine, and associated  
6 tissue, of zebrafish larvae that we raised in the presence or absence of a microbiome. We uncovered  
7 extensive cellular heterogeneity in the conventional zebrafish intestinal epithelium, including previously  
8 undescribed cell types with known mammalian homologs. By comparing conventional to germ-free  
9 profiles, we mapped microbial impacts on transcriptional activity in each cell population. We revealed  
10 intricate degrees of cellular specificity in host responses to the microbiome that included regulatory  
11 effects on patterning, metabolic and immune activity. For example, we showed that removal of microbes  
12 hindered pro-angiogenic signals in the developing vasculature, resulting in impaired intestinal  
13 vascularization. Our work provides a high-resolution atlas of intestinal cellular composition in the  
14 developing fish gut and details the effects of the microbiome on each cell type. Furthermore, we provide  
15 a web-based resource for single-cell gene expression visualization under conventional and germ-free  
16 conditions to facilitate exploration of this dataset.

17

18

19

20

21

22

23

24

## 25 INTRODUCTION

26           Research conducted with a variety of model organisms has revealed much about the importance  
27 of gut microbes for host health. Animals raised in sterile, germ-free environments frequently exhibit  
28 defects in growth, immunity and metabolism (Bates et al., 2006; Hooper et al., 2001; Rawls et al., 2004;  
29 Reikvam et al., 2011). Of equal importance, changes in composition or distribution of gut microbial  
30 communities are associated with severe and sometimes deadly illnesses, including gastrointestinal  
31 cancers and inflammatory bowel diseases (Belkaid and Hand, 2014; Zitvogel et al., 2015). Thus, it is critical  
32 to fully understand how the microbiota impacts development, growth, and cellular function of host  
33 organisms.

34           Zebrafish larvae have emerged as a valuable tool to identify key regulators of host-microbe  
35 interactions (Brugman, 2016; Flores et al., 2020; López Nadal et al., 2020). Zebrafish embryos develop  
36 within a protective chorion that shields them from environmental microbes up to forty-eight hours post  
37 fertilization (hpf). Once larvae exit the chorion, water-borne microbes colonize the gut lumen (Bates et  
38 al., 2006; Stephens et al., 2016; Wallace et al., 2005), where they influence host development (Bates et  
39 al., 2006; Cheesman et al., 2011; Kanther et al., 2011; Koch et al., 2018). From a technical perspective,  
40 zebrafish offer several advantages to pinpoint developmental responses to the microbiota. Larvae are  
41 amenable to sophisticated manipulations, including genetic modifications from the single cell stage  
42 (Grunwald and Eisen, 2002). Additionally, researchers have simple protocols to generate large numbers  
43 of germ-free larvae, or larvae associated with defined microbial communities (Melancon et al., 2017;  
44 Pham et al., 2008), and the translucent epidermis is ideal for visualization of internal structures in fixed or  
45 live samples. Thus, zebrafish provide a convenient window to visualize microbial controls of vertebrate  
46 physiology.

47           Importantly, genetic regulation of intestinal function is highly similar between zebrafish and  
48 mammals. In both systems, orthologous signals, including those driven by Notch, Bone Morphogenetic

49 Protein (BMP) and Wnt pathways, direct development of absorptive and secretory cell lineages from  
50 cycling progenitors in the intestinal epithelium (Cheesman et al., 2011; Crosnier et al., 2005; Davison et  
51 al., 2017; Flasse et al., 2013; Haramis et al., 2006; Muncan et al., 2007; Roach et al., 2013; Yang et al.,  
52 2009). While the zebrafish intestine possesses mucin-producing goblet cells and regulatory  
53 enteroendocrine cells (Crosnier et al., 2005; Ng et al., 2005; Wallace et al., 2005), there are no reports of  
54 immune-modulatory Paneth or tuft cells. Our understanding of absorptive lineages is less complete. Like  
55 mammals, the fish intestinal epithelium includes regionally specialized enterocytes that harvest nutrients  
56 from the lumen (Lickwar et al., 2017; Ng et al., 2005; Park et al., 2019; Wallace et al., 2005; Wang et al.,  
57 2010b). However, the extent of functional heterogeneity within enterocyte populations is unclear, and  
58 we do not know if the intestinal epithelium houses specialized absorptive cells such as antigen-capturing  
59 M cells, or recently described Best4/Otop2 cells (Parikh et al., 2019; Smillie et al., 2019). Likewise, despite  
60 experimental evidence for the existence of cycling progenitors (Crosnier et al., 2005; Li et al., 2020; Peron  
61 et al., 2020; Rawls et al., 2004; Wallace et al., 2005), we lack expression markers that permit identification  
62 and manipulation of this essential cell type. Combined, these deficits have hampered our ability to harness  
63 the full potential of the zebrafish as a model of intestinal biology and host-microbe interactions.

64 From a microbial perspective, similarities between fish and mammals are also evident. Like  
65 mammals, fish rely on a complex network of germline-encoded innate defenses, and lymphocyte-based  
66 adaptive defenses to prevent invasion of interstitial tissues by gut-resident microbes (Flores et al., 2020;  
67 Hernández et al., 2018). Transcriptional studies showed that orthologous genes mediate microbe-  
68 dependent control of epithelial proliferation, nutrient metabolism, xenobiotic metabolism, and innate  
69 immunity (Davison et al., 2017; Heppert et al., 2021; Hooper et al., 2001; Koch et al., 2018; Rawls et al.,  
70 2004; Reikvam et al., 2011). *In vivo* studies support a shared role for the microbiota in developmental  
71 processes including epithelial renewal, secretory cell differentiation, and gut motility (Cheesman et al.,  
72 2011; Troll et al., 2018; Wiles et al., 2016). Microbes also educate immune systems in fish and mammals,

73 inducing mucosal inflammation and myeloid cell recruitment through Myd88-dependent TLR signals  
74 (Galindo-Villegas et al., 2012; Koch et al., 2018; Takeda and Akira, 2005). Like mammals, fish neutralize  
75 pathogenic bacteria via epithelial production of reactive oxygen species and antimicrobial peptides (Flores  
76 et al., 2010; Katzenback, 2015). Additionally, experimental evidence in fish revealed that epithelial alkaline  
77 phosphatase detoxifies LPS, a finding later corroborated in mice (Bates et al., 2007; Goldberg et al., 2008).  
78 These findings demonstrate that zebrafish, alongside other models, can inform our understanding of  
79 microbial impacts on host development and disease.

80         While recent studies provide significant insights into microbe-dependent host processes, much of  
81 this work focused on how microbes impact whole organisms, the entire intestine, or intestinal regions.  
82 Thus, a knowledge gap exists in our understanding of cell type-specific processes reliant on microbial  
83 signals. A few studies addressed this disparity via fluorescent activated cell sorting of intestinal epithelial  
84 sub-populations (Arora et al., 2018), however this method requires foreknowledge of, and access to, cell  
85 type-specific antibodies or reporters, and assays are limited to one cell type per experiment.

86         To achieve unbiased cell type-specific analysis of microbe-dependent processes, and to advance  
87 cellular characterization of the fish intestine, we prepared single cell transcriptional atlases of intestines  
88 from 6 days post fertilization (dpf) zebrafish larvae raised in a conventional environment, or in the absence  
89 of a microbiome. We identified thirty-five distinct transcriptional states in the intestine, several of which  
90 were previously undescribed, and completed a high-resolution map of cellular responses to the  
91 microbiota that showed cell-specific microbial effects on growth, patterning, and immunity in the host.  
92 To facilitate community-wide mining of our results, we have made both sets publicly accessible for user-  
93 friendly visualization on the Broad Institute Single Cell Portal  
94 ([https://singlecell.broadinstitute.org/single\\_cell/reviewer\\_access/87c42f87-8308-4add-ba37-  
95 54887dd1977a](https://singlecell.broadinstitute.org/single_cell/reviewer_access/87c42f87-8308-4add-ba37-54887dd1977a)).

96

## 97 RESULTS

### 98 A single cell atlas of the zebrafish larval intestine

99 To trace effects of commensal microbes on intestinal physiology, we prepared single-cell  
100 transcriptional profiles of digestive tracts from 6 dpf zebrafish larvae raised under conventional (CV) or  
101 germ-free (GF) conditions (Fig. 1A and Supplementary Fig. 1). Our results included tissues that exist in  
102 close association with the gut, such as the pancreas and liver. After filtering for dead cells and doublets,  
103 we determined gene expression profiles for 18,345 individual cells (8,036 CV; 10,309 GF; Fig. 1B). To  
104 advance our understanding of cellular heterogeneity within the intestine, we used graph-based clustering  
105 to identify cell types within our integrated data (Fig. 1B). We identified 35 distinct clusters (Supplementary  
106 Table 1), which we grouped into 18 cell types based on expression of known markers (Fig. 1B).

107 Our datasets were dominated by expression profiles for intestinal epithelial cells (IECs). For example,  
108 we identified secretory peptide hormone-producing enteroendocrine cells, as well as goblet cells marked  
109 by expression of the goblet cell differentiation factor *anterior gradient 2 (agr2)*, and *sstr5* (Fig. 1C), a gene  
110 product that stimulates Mucin 2 production in the mouse colon (Song et al., 2020). We also uncovered a  
111 goblet-like cluster that upregulated *pdx1* (Fig. 1C), enriched in secretory cells of the foregut and pancreas  
112 (Lavergne et al., 2020). Besides endocrine and goblet cell lineages, we identified an unexpected cluster  
113 with pronounced transcriptional similarity to mammalian intestinal tuft cells, including expression of tuft  
114 cell marker genes *Gng13*, *Trpm5*, *Avil*, and the tuft cell specification master regulator *Pou2f3* (Haber et al.,  
115 2017) (Fig. 1C and Supplementary Fig. 2A-C). Transmission electron microscopy of adult zebrafish  
116 intestinal epithelia uncovered a rare, rotund cell type with classical morphological features of intestinal  
117 tuft cells (Hoover et al., 2017), namely a tubular cytoskeletal network below an apical tuft of microvilli  
118 (Supplementary Fig. 2D). Thus, our data suggest that, like mammals, zebrafish may contain a rare  
119 population of sensory intestinal tuft cells.

120 The majority of IECs were absorptive cells and included canonical enterocyte (EC) lineages that  
121 expressed genes required for nutrient acquisition and metabolism, as well as recently described lysosome-  
122 rich enterocytes (LREs) (Fig. 1C and Supplementary Table 1), thought to mediate protein degradation (Park  
123 et al., 2019). Separately, we discovered a population of Best4/Otop2 cells (Fig. 1B-C and Supplementary  
124 Table 1), an absorptive lineage recently described in humans (Parikh et al., 2019; Smillie et al., 2019), and  
125 uncharacterized in zebrafish. Like human Best4/Otop2 cells, the fish counterparts were marked by  
126 enhanced expression of *notch2* and Notch-responsive *hes-related* family members (Fig. 1C,  
127 Supplementary Table 1 and Supplementary Fig. 3). Additionally, zebrafish Best4/Otop2 cells expressed  
128 the chloride/bicarbonate transporter *cftr* (Fig. 1C and Supplementary Table 1), suggesting possible  
129 functional similarities with human duodenal BCHE cells (Busslinger et al., 2021).

130 Apart from absorptive and secretory lineages, our initial clustering uncovered two populations that  
131 displayed features associated with intestinal progenitor cells, including expression of Notch pathway  
132 components *dld*, *dla*, and *HES5* orthologues *her15* and *her2* (progenitor-like 1), as well as *notch3*  
133 (progenitor-like 2) (Fig 1C and Supplementary Table 1). A more detailed analysis resolved the putative  
134 progenitor pool into four sub-clusters with distinct transcriptional hallmarks (Fig. 1D-E). Of these four, we  
135 believe cluster one is hepatic in origin, as it is marked by expression of liver-associated genes *apoa2* and  
136 *fabp10a* (Fig. 1E). In contrast, cells from clusters zero, two, and three had features frequently associated  
137 with intestinal progenitors. Cluster zero was marked by expression of the gut-associated genes *onecut1*  
138 (Matthews et al., 2004) and *notch3* (Crosnier et al., 2005) in addition to *sox9b* (Fig. 1E), an intestinal stem  
139 cell marker in medaka fish (Aghaallaei et al., 2016), and a marker of basal columnar IECs in adult zebrafish  
140 (Peron et al., 2020). Additionally, cluster zero cells expressed elevated amounts of *epcam* (Fig. 1E), a gene  
141 linked with intestinal epithelial proliferation in vertebrates (Ouchi et al., 2021). Cluster two cells expressed  
142 intestinal epithelial cell markers *cldn15la* (Alvers et al., 2014) and *vil1* (Abrams et al., 2012; Thakur et al.,  
143 2014), as well as regulators of intestinal progenitor cell division and differentiation, such as *cdx1b* (Flores

144 et al., 2008) and *atoh1b* (Fig. 1E). Furthermore, fluorescence imaging of intestines from *Tg(tnfrsf11a:GFP)*  
145 fish that expressed GFP under control of the promoter for cluster two marker *tnfrsf11a* showed that, like  
146 intestinal progenitors (Li et al., 2020; Ng et al., 2005), cluster two cells reside at the base of intestinal folds  
147 (Fig. 1F). Finally, we identified cluster three as a cycling population that actively expressed proliferation  
148 markers of mammalian transit amplifying cells (Haber et al., 2017), such as *mki67*, *cdk1*, and *top2a* (Fig.  
149 1E). Thus, our transcriptional and *in vivo* data identified a previously undescribed pool of IECs with  
150 hallmarks of intestinal progenitors, although lineage tracing studies are required for confirmation. In sum,  
151 we have identified a panel of expression markers that distinguish major lineages of the zebrafish digestive  
152 tract, including previously undescribed tuft-like cells, Best4/Otop2 cells, and possible markers of intestinal  
153 progenitors.  
154



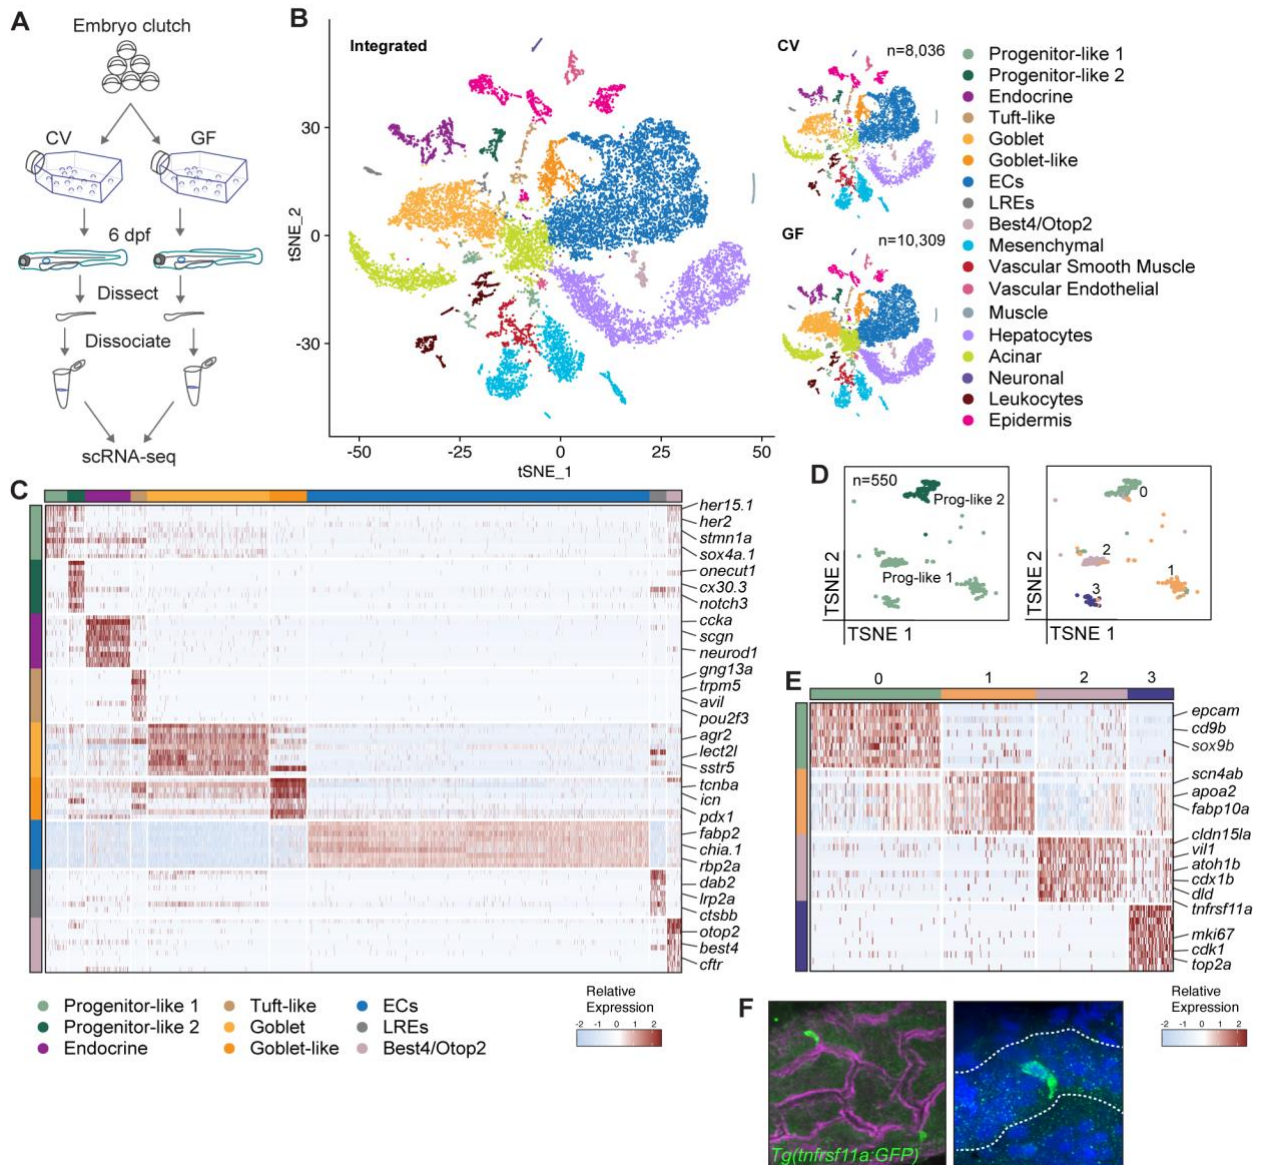

155

156 **Figure 1. Transcriptionally distinct cell populations in the zebrafish intestine.** (A) Experimental design for  
 157 transcriptional profiling of single cells in the zebrafish intestine. (B) 2D t-SNE projections of profiled cells  
 158 color coded by cell type. Left panel shows t-SNE of integrated CV and GF datasets, with CV and GF  
 159 conditions shown independently on the top and bottom right respectively. (C) Heatmap of IEC cluster  
 160 markers colored by relative gene expression. Cell types are indicated by colored bars on the left and top.  
 161 Several top markers for each cluster are shown on the right axis of the heatmap. (D) t-SNE plots of  
 162 progenitor-like clusters 1 and 2 from original graph-based analysis (left) and further re-clustering (right),  
 163 color coded by cell type. (E) Heatmap of cell markers for putative progenitor-like clusters, colored by  
 164 relative gene expression. Cell types are indicated by colored bars on the left and top. Several top markers  
 165 for each cluster are shown on the right axis of the heatmap. (F) Optical section of a whole gut from 6 dpf  
 166 *Tg(tnfrsf11a:GFP)* zebrafish, stained with phalloidin to visualize filamentous actin (magenta) and Hoechst  
 167 to visualize nuclei (blue). Right panel is a magnified image of a GFP positive cell from the left panel.  
 168

## 169 **Cell type-specific effects of gut microbes on host gene expression**

170 Despite critical roles for microbial factors in regulation of host physiology, we have made sporadic  
171 progress charting cell type-specific responses to the microbiome. Like other facilities (Roeselers et al.,  
172 2011), our fish primarily host  $\gamma$ - and  $\alpha$ -Proteobacteria (Supplementary Tables 2 and 3). Therefore, we  
173 believe that comparisons between our GF and CV data may uncover relevant cell-specific responses to  
174 the microbiome.

175 We first confirmed that our data reproduce known effects of GF growth on host gene expression.  
176 Among the top globally differentially expressed genes in GF fish relative to CV controls, we identified  
177 known microbe-dependent effects on expression of a range of host genes (Rawls et al., 2004), including  
178 *gpx1b*, *socs3a*, and *tyrosine aminotransferase (tat)* (Fig. 2A). Additionally, we used Nanostring quantitative  
179 analysis to independently validate effects of the microbiome on expression of host genes observed in our  
180 single cell data (Fig. 2B). Finally, of 175 microbe-responsive genes identified by Rawls and co-authors  
181 (2004), we observed 125 (71%) with significant microbe-dependent expression changes in at least one cell  
182 subset (Supplementary Table 4). Collectively, these observations argue that our gene expression data  
183 accurately report effects of the microbiome on gut function.

184 In some cases, such as *tat*, elimination of the microbiome altered gene expression throughout the gut  
185 (Supplementary Table 4). However, we also observed instances where GF growth impacted gene  
186 expression in specific cell types. For example, removal of the microbiome attenuated *moesin a (msna)*  
187 expression exclusively in vascular endothelial cells, vascular smooth muscle, progenitors, and leukocytes  
188 (Supplementary Table 4). To explore cell-type specific microbiome responses in greater detail, we  
189 characterized the transcriptional programs of progenitor-like cells raised under CV and GF conditions. We  
190 selected progenitors, as microbes are established modifiers of proliferation and differentiation, including  
191 Notch pathway components (Crosnier et al., 2005; Flasse et al., 2013; Roach et al., 2013; Yang et al., 2009).  
192 We observed remarkable cellular specificity in the responses of putative progenitor clusters to GF growth

193 (Supplementary Fig. 4). For example, cells from progenitor-like cluster two downregulated Notch-  
194 responsive transcription factors *atoh1b* and *her15.1*, as well as the intestinal Notch ligand *delta D (dld)*  
195 when grown in the absence of a microbiome (Supplementary Fig. 4B-D). Intriguingly, we also observed  
196 decreased expression of *interferon-related developmental regulator 1 (ifrd1)* in progenitor-like cluster two  
197 (Supplementary Fig. 4D), an immune response gene that regulates gut epithelial proliferation (Yu et al.,  
198 2010). Thus, our data indicate that a specific subset of candidate progenitors are particularly sensitive to  
199 the impacts of microbial factors on Notch activity.

200 To test the utility of our data for cell-specific mapping of signaling pathway activity in the presence or  
201 absence of microbes, we visualized relative expression of microbial sensors, NF- $\kappa$ B pathway components,  
202 cytokines and chemokines in CV and GF fish. In CV larvae, we detected cell-restricted expression of key  
203 immune sensors and effectors (Supplementary Fig. 5). For example, leukocytes expressed immune-  
204 regulatory cytokines such as *cxcl8a*, *il1b*, and *tnfa*, whereas the vasculature was characterized by enriched  
205 expression of microbial sensor *tlr4ba*, cytokine *tgfb1b* and the inflammation regulator *ahr2*. Like  
206 mammals, CV hepatocytes expressed the *hamp* antimicrobial peptide, while mesenchymal cells were  
207 characterized by enriched expression of *cxcl8b* isoforms, *cxcl12*, and the *tgfb1a*, *tgfb2* and *tgfb3* cytokines.  
208 Within the intestinal epithelium, most enterocyte subtypes produced *alpi.2*, a phosphatase required for  
209 detoxification of bacterial lipopolysaccharide (Bates et al., 2007), whereas enteroendocrine cells  
210 expressed *il22*, a cytokine that activates epithelial innate defenses (Dudakov et al., 2015). In agreement  
211 with previous reports (Kanter et al., 2011), *serum amyloid A (saa)* was expressed in mid-intestinal LREs  
212 and goblet cells. Intriguingly, we also saw enhanced *nod1*, *nod2* and *myd88* expression in CV tuft-like cells,  
213 consistent with proposed roles for Nod1 and Nod2 in type 2 immunity in tuft cells (Magalhaes et al., 2011).  
214 Removal of the microbiome significantly impacted organization of immune pathways in developing larvae.  
215 In particular, we noted greatly diminished expression of *il22* from endocrine cells and leukocytes; *nod1*  
216 from progenitors, mesenchyme, and vasculature; *ifit14* and *ifit15* (*IFIT1* orthologues) from enterocytes;

217 *stat2* across IECs; and *tgf* isoforms from mesenchymal cells, vasculature, and leukocytes. Combined, our  
218 data uncover a sophisticated partitioning of immune gene expression patterns across CV cell types, many  
219 of which indicate shared microbe-response pathways in zebrafish and mammals. Importantly, we believe  
220 the utility of our gene expression data extends beyond identification of cell-specific immune activity. To  
221 facilitate community-wide mining of our results for all pathways or genes of interest, we have made both  
222 sets publicly available for user-friendly visualization on the Broad Institute Single Cell Portal.

223

224

225

226

227

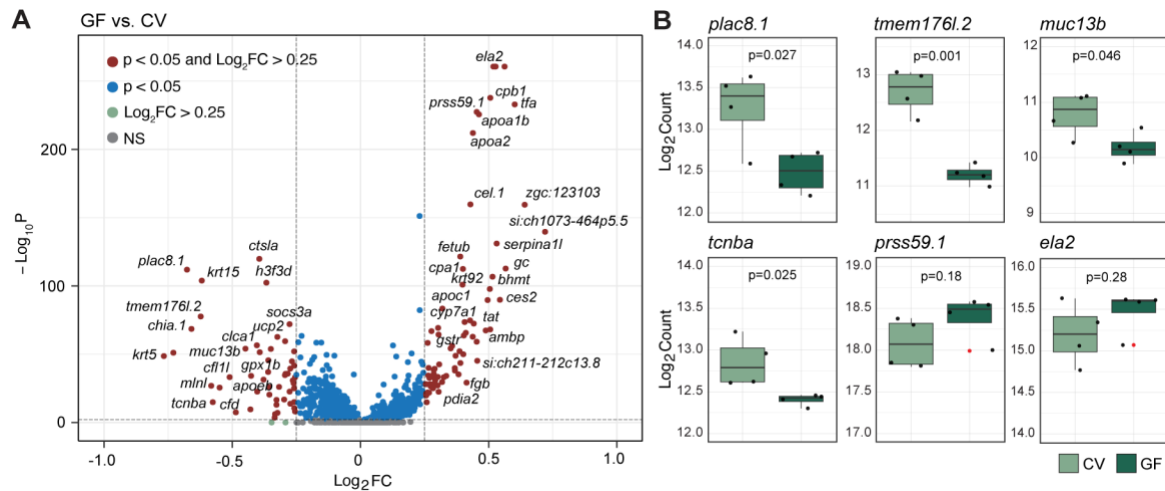

229

230 **Figure 2. Microbial control of host gene expression.** (A) Volcano plot of differentially expressed genes in  
231 GF relative to CV cells, treated in aggregate. Significance was determined in Seurat using the non-  
232 parametric Wilcoxon rank sum test. (B) Boxplots of Nanostring gene expression analysis from dissected  
233 whole guts. Four replicates (n=15 guts per replicate) were analyzed per condition. Outliers are indicated  
234 with red dots. Significance was determined using a Student's *t*-test.

235

236

## 237 **Microbes regulate larval secretory lineage functions**

238 Zebrafish secretory lineages primarily consist of hormone-producing enteroendocrine cells and  
239 mucus-secreting goblet cells. To understand how secretory cells interact with a conventional microbiome,  
240 we generated a transcriptional atlas of secretory cells from CV and GF fish. Among the enteroendocrine  
241 population, we uncovered six distinct transcriptional cell states, each marked by a unique pattern of  
242 peptide hormone production (Fig. 3A-B) and distinct spatial distribution profiles (Supplementary Fig. 6A).  
243 For example, CV enteroendocrine cluster five cells expressed anterior intestinal markers, and were  
244 characterized by production of *ccka* and *cckb*, regulators of gut motility, satiety, and lipid and protein  
245 digestion (Le et al., 2019; Rehfeld, 2017). By contrast, enteroendocrine cluster three cells appeared to  
246 have a more diffuse rostro-caudal distribution and were the predominant source of the motility regulator  
247 *vipb*, and the multifunctional peptide *galn*. We observed modest effects of GF growth on expression of  
248 most peptide hormones, suggesting that enteroendocrine lineage specification is broadly insensitive to  
249 microbial exposure. However, we detected instances where microbial presence significantly affected  
250 hormone expression profiles of distinct enteroendocrine lineages. In particular, we observed significantly  
251 diminished expression of *gip* and *gcgb* within cluster four enteroendocrine cells, as well as enhanced  
252 expression of the appetite suppressant *pyyb* in cluster five cells. These data support roles for microbes in  
253 modifying levels of *gip* and *glucagon*, incretin hormones that regulate glucose metabolism and insulin  
254 secretion (Gribble and Reimann, 2016), and further implicate microbes in the control of *pyyb* production.

255 Upon examination of goblet cells, we identified two clusters (Fig. 3C) defined by highly similar gene  
256 expression profiles (Supplementary Table 1), where cluster one was enriched for *agr2* (Supplementary  
257 Fig. 6B), and both clusters primarily expressed mid-intestinal markers (Supplementary Fig. 6A), consistent  
258 with goblet cell distribution in zebrafish guts (Ng et al., 2005; Wallace et al., 2005). Furthermore, we  
259 identified an *agr2*-enriched goblet-like cluster that expressed *mucin 5.3* (Supplementary Fig. 6C), known

260 to be enriched in the esophagus (Jevtov et al., 2014), suggesting that this cluster may represent mucus-  
261 producing foregut cells.

262 We were intrigued by apparent changes to immunity in GF goblet cells relative to CV counterparts  
263 (Supplementary Fig. 5), so we examined goblet cell immune gene expression in greater detail. Removal of  
264 the microbiome had cluster-specific impacts on several immune regulators. For example, microbiome  
265 elimination resulted in significantly diminished expression of the putative LPS-binding molecule and anti-  
266 microbial peptide *ly97.2* (Liu et al., 2017; Wang et al., 2016), as well as the inflammation mediators *irg1l*  
267 (Hall et al., 2014; van Soest et al., 2011) and *lect2l* (Gonçalves et al., 2012) in goblet cell clusters 1 and 2.  
268 In contrast, GF growth led to diminished expression of *interferon alpha inducible protein 27 (IFI27)*  
269 orthologues across all goblet cells, whereas absence of the microbiome exclusively attenuated expression  
270 of *CCL19* orthologues in cluster one cells (Fig. 3D). We validated microbiome-dependent expression  
271 changes to several genes including *IFI27* orthologues, *irg1l*, *ccl19b*, and IL-1 $\beta$  regulator *stmp1* by whole-  
272 tissue Nanostring gene expression analysis (Fig. 3E), further supporting a role for goblet cell-mediated IFN  
273 and inflammatory signaling in response to commensal microbes. In short, our data uncovered a complex  
274 arrangement of goblet and enteroendocrine IECs with non-overlapping rostro-caudal distribution and  
275 subset-specific responses to a conventional microbiome.

276

277

278

279

280

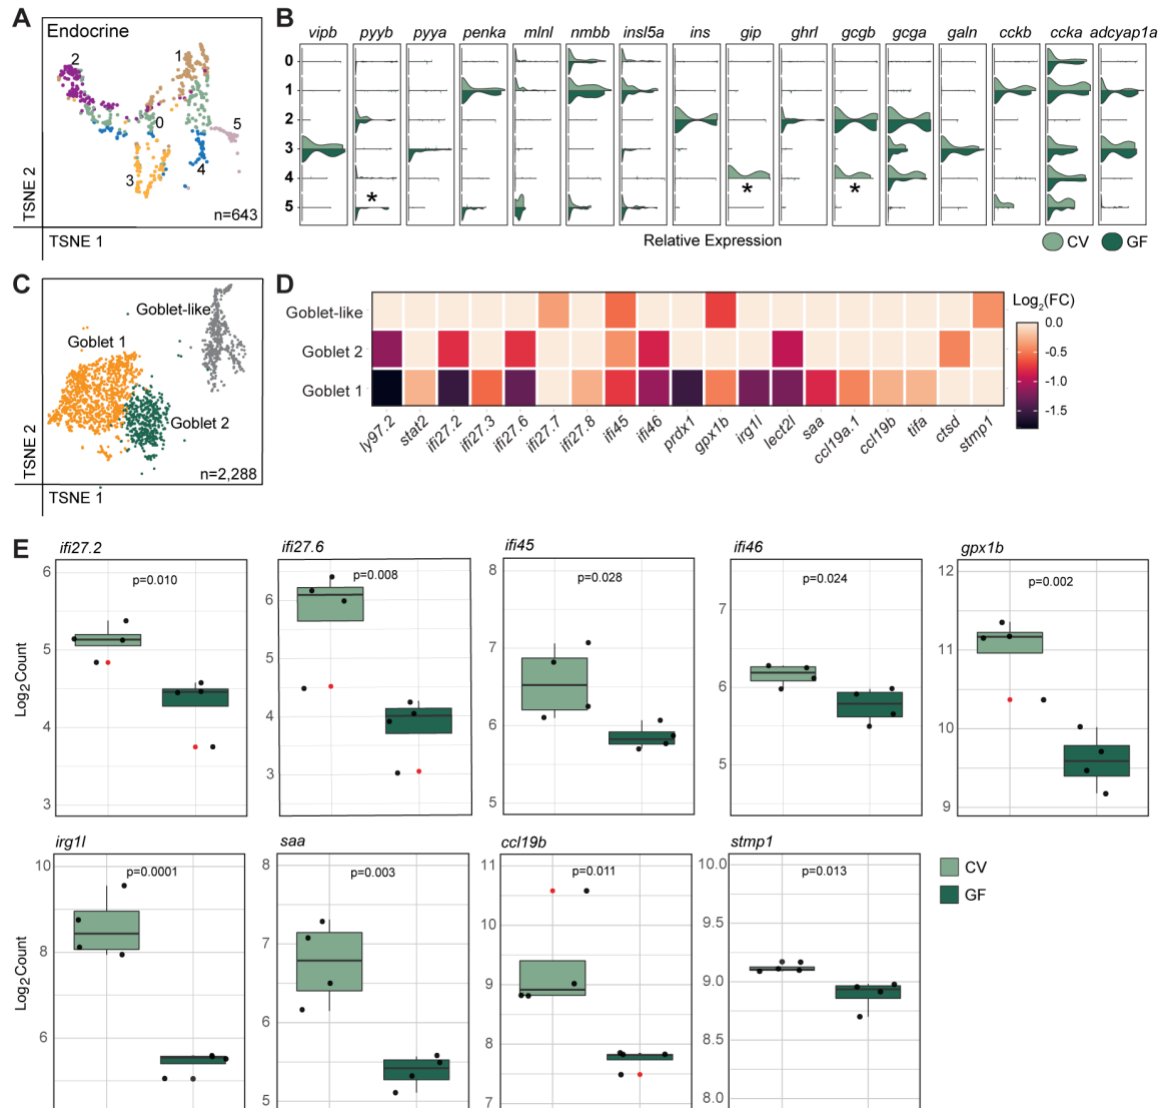

281

282 **Figure 3. Germ-free growth alters peptide hormone expression in enteroendocrine cells and immune**  
 283 **signaling in goblet cells.** (A) t-SNE plot of enteroendocrine cells after re-clustering, color coded by cell  
 284 type. (B) Violin plots for expression of zebrafish peptide hormones, as expressed in enteroendocrine  
 285 clusters 0-5. Asterisks indicate significant gene expression differences ( $p < 0.05$ ) between GF and CV  
 286 conditions, as determined with a non-parametric Wilcoxon rank sum test. (C) t-SNE plot of goblet and  
 287 goblet-like cell clusters color coded by cell type. (D) Heatmap of differentially expressed immune related  
 288 genes in GF relative to CV cell populations, color coded according to  $\text{Log}_2(\text{FC})$ . All non-zero value  
 289 expression changes are significant ( $p < 0.05$ ) as determined with a non-parametric Wilcoxon rank sum test.  
 290 (E) Boxplots of Nanostring gene expression analysis from dissected whole guts. Four replicates ( $n=15$  guts  
 291 per replicate) were analyzed per condition. Outliers are indicated with red dots. Significance was  
 292 determined using a Student's  $t$ -test.

293

294

295

296 **The zebrafish intestinal epithelium houses functionally diverse absorptive lineages.**

297 Like most animals, the zebrafish intestinal epithelium primarily contains absorptive cells that acquire  
298 material from the gut lumen. In fish, metabolite acquisition relies on specialist enterocyte and protein-  
299 acquiring LRE lineages (Lickwar et al., 2017; Ng et al., 2005; Park et al., 2019; Wallace et al., 2005; Wang  
300 et al., 2010b). To characterize microbial responsiveness and functional specializations within each lineage,  
301 we analyzed gene expression in absorptive clusters from our integrated CV and GF datasets. We identified  
302 five enterocyte clusters (Fig. 4A), of which clusters one to four were enriched in the anterior intestine (Fig.  
303 4D) and marked by expression of genes required for lipid, carbohydrate, chitin, and small molecule  
304 metabolism (Fig. 4B-C and Supplementary Table 1). Cluster five cells were a distinct subset, specialized in  
305 the metabolism of xenobiotic compounds (Fig. 4C), and transport of vitamin B12 by *transcobalamin beta*  
306 *a (tcnba)* (Fig. 4B and Supplementary Table 1). Alongside enterocytes, we captured expression profiles for  
307 three separate absorptive lineages, two of which had expression profiles consistent with LREs (Park et al.,  
308 2019). LRE1 cells were relatively rare and expressed pronephros markers such as *lrp2a*, *zgc:64022* and  
309 *tspan35* (Fig. 4B and Supplementary Table 1), suggesting that LRE1 cells are renal. In contrast, LRE2 cells  
310 appear mid-intestinal (Fig. 4D), enriched for expression of genes required for peptide catabolism, in  
311 agreement with a role for mid-intestinal LREs in protein digestion (Park et al., 2019). Lastly, we identified  
312 a previously unknown absorptive lineage analogous to recently characterized human colonic  
313 BEST4/OTOP2 cells (Parikh et al., 2019; Smillie et al., 2019). Like the human equivalent, zebrafish  
314 Best4/Otop2 cells were a posterior cell type (Fig. 4D), that expressed genes required for ion transport  
315 (*cftr*, *ca2*, *best4*).

316 As absorptive cells make frequent, direct contacts with luminal microbes, we expected substantial  
317 transcriptional shifts in response to microbe-free development. To test this hypothesis, we assessed the  
318 consequences of microbiome exposure on immune responses within absorptive populations. Enterocyte  
319 clusters one to four had uniform transcriptional responses to GF growth, including downregulation of



320 *plac8.1*, *cathepsin La (ctsla)*, and the interferon pathway element *socs3a* (Fig. 4E). By contrast, cluster five  
321 cells, a putative foregut IEC population, showed a robust response to GF growth that included suppressed  
322 induction of interferon-response genes, and diminished expression of the *cxcl18a.1* chemokine (Fig. 4E).  
323 LRE1 cells did not display significant changes in GF fish, consistent with renal localization. However, mid-  
324 intestinal LRE2 cells exhibited dramatic changes following microbial elimination, including suppressed  
325 expression of the NF- $\kappa$ B pathway elements *lgals2b* and *nfkbiaa* (Fig. 4E). Remarkably, GF LRE2 cells  
326 exhibited considerable similarities with the GF response of cluster one goblet cells, including significant  
327 downregulation of *prdx1*, *lect2l*, *saa*, and numerous interferon-stimulated genes (Fig. 4E), suggesting that  
328 mid-intestinal LRE2 and goblet one clusters have overlapping immune responses to microbial encounters.  
329 Collectively, our data indicate that mature zebrafish IECs include a sophisticated organization of  
330 absorptive lineages that contribute to regionally-specialized immune responses to gut microbes.  
331



## 346 **Cell-specific effects of microbial exposure on leukocyte and stromal activity**

347 As our data included non-epithelial lineages, we expanded our study to map relationships between  
348 microbiome colonization and gene activity in leukocytes and stromal cells, critical regulators of host-  
349 microbe interactions. We uncovered two highly distinct larval leukocyte clusters (Fig. 5A and  
350 Supplementary Table 1). Cluster one was a mixed phagocyte population that expressed macrophage and  
351 neutrophil markers such as *spi1b*, *mpeg1.1*, and *mpx* (Fig. 5B, C). In contrast, cluster two cells expressed  
352 classical markers of developing T cells (Ma et al., 2013), such as *ikaros (ikzf1)*, *runx3* and *ccr9a*, as well as  
353 the *T-cell receptor alpha/delta variable 14.0* gene segment (*tradv14.0*) (Fig. 5B-D), supporting prior  
354 reports of immature T cells in 6 dpf fish (Ma et al., 2013). Future work is required to determine if T cells  
355 have already seeded the larval intestine by day six, or if these cells originated from thymic or kidney tissue  
356 attached to dissected guts. The microbiome primarily impacted gene expression within phagocytes, where  
357 GF growth led to significantly diminished expression of interferon and cytoskeletal components relative  
358 to CV controls (Fig. 5G), and attenuated production of key immune regulators such as *stat1a* and *stat2*,  
359 and the pro-inflammatory cytokines *il1b*, *tnfa* and *tnfb* (Fig. 5I).

360 Mesenchymal cells segregated into four distinct clusters (Fig. 5E), of which cluster one represented a  
361 fibroblast population that expressed extracellular matrix components such as *col1a1a* and *col1a2*, and the  
362 fibroblast marker *vimentin (vim)* (Fig. 5F). The identity of mesenchymal cluster two is unclear; however, it  
363 was marked by expression of ammonia transporter *rhag*, and *aqp1a.1* (Fig. 5F) involved in ammonia,  
364 water, and CO<sub>2</sub> transport (Horng et al., 2015; Talbot et al., 2015), suggesting these cells regulate gas and  
365 ion movement. Cluster three cells were marked by ECM components *matrilin 1 (matn1)* and several  
366 collagens, as well as *fibroblast growth factor binding protein 2b (fgfbp2b)*, also indicative of fibroblast  
367 identity (Fig. 5F). Finally, mesenchyme cluster four was marked by expression of soluble pattern  
368 recognition receptors from the collectin family (Supplementary Table 1), and vasculature markers *angptl6*  
369 and *agtr2* (Fig. 5F), indicating that cluster four likely represents perivascular fibroblasts. Among the

370 mesenchymal clusters, removal of the microbiome primarily attenuated expression of genes associated  
371 with metabolism (Fig. 5G). In contrast, GF growth had sizable effects on gene expression in vascular  
372 smooth muscle and endothelial cells. Relative to CV controls, GF vascular cells expressed significantly  
373 lower amounts of genes that regulate leukocyte migration, cell proliferation, and sprouting angiogenesis.  
374 (Fig. 5G). Furthermore, unlike mesenchymal cell-types, vascular smooth muscle cells exhibited  
375 significantly decreased chemokine expression under GF growth conditions (Fig. 5H-I), implicating vascular  
376 cells as an intermediary in microbe-dependent leukocyte recruitment. Consistent with a role for vascular  
377 cells in mediating microbial recruitment of leukocytes, we found that, compared to CV controls, vascular  
378 smooth muscle cells from GF fish downregulated expression of the lymphocyte chemotactic regulator  
379 *cxc12b*, and the granulocyte chemotaxis regulator *cxc18b*, while vascular endothelial cells  
380 downregulated *cd99*, a promoter of trans-endothelial leukocyte migration (Schenkel et al., 2002). In  
381 summary, we have identified distinct leukocyte and stromal cell subtypes in the larval gut. Our data  
382 uncover differential degrees of microbial sensitivity within the subtypes and implicate vascular cells as  
383 agents of microbe-responsive leukocyte migration.  
384

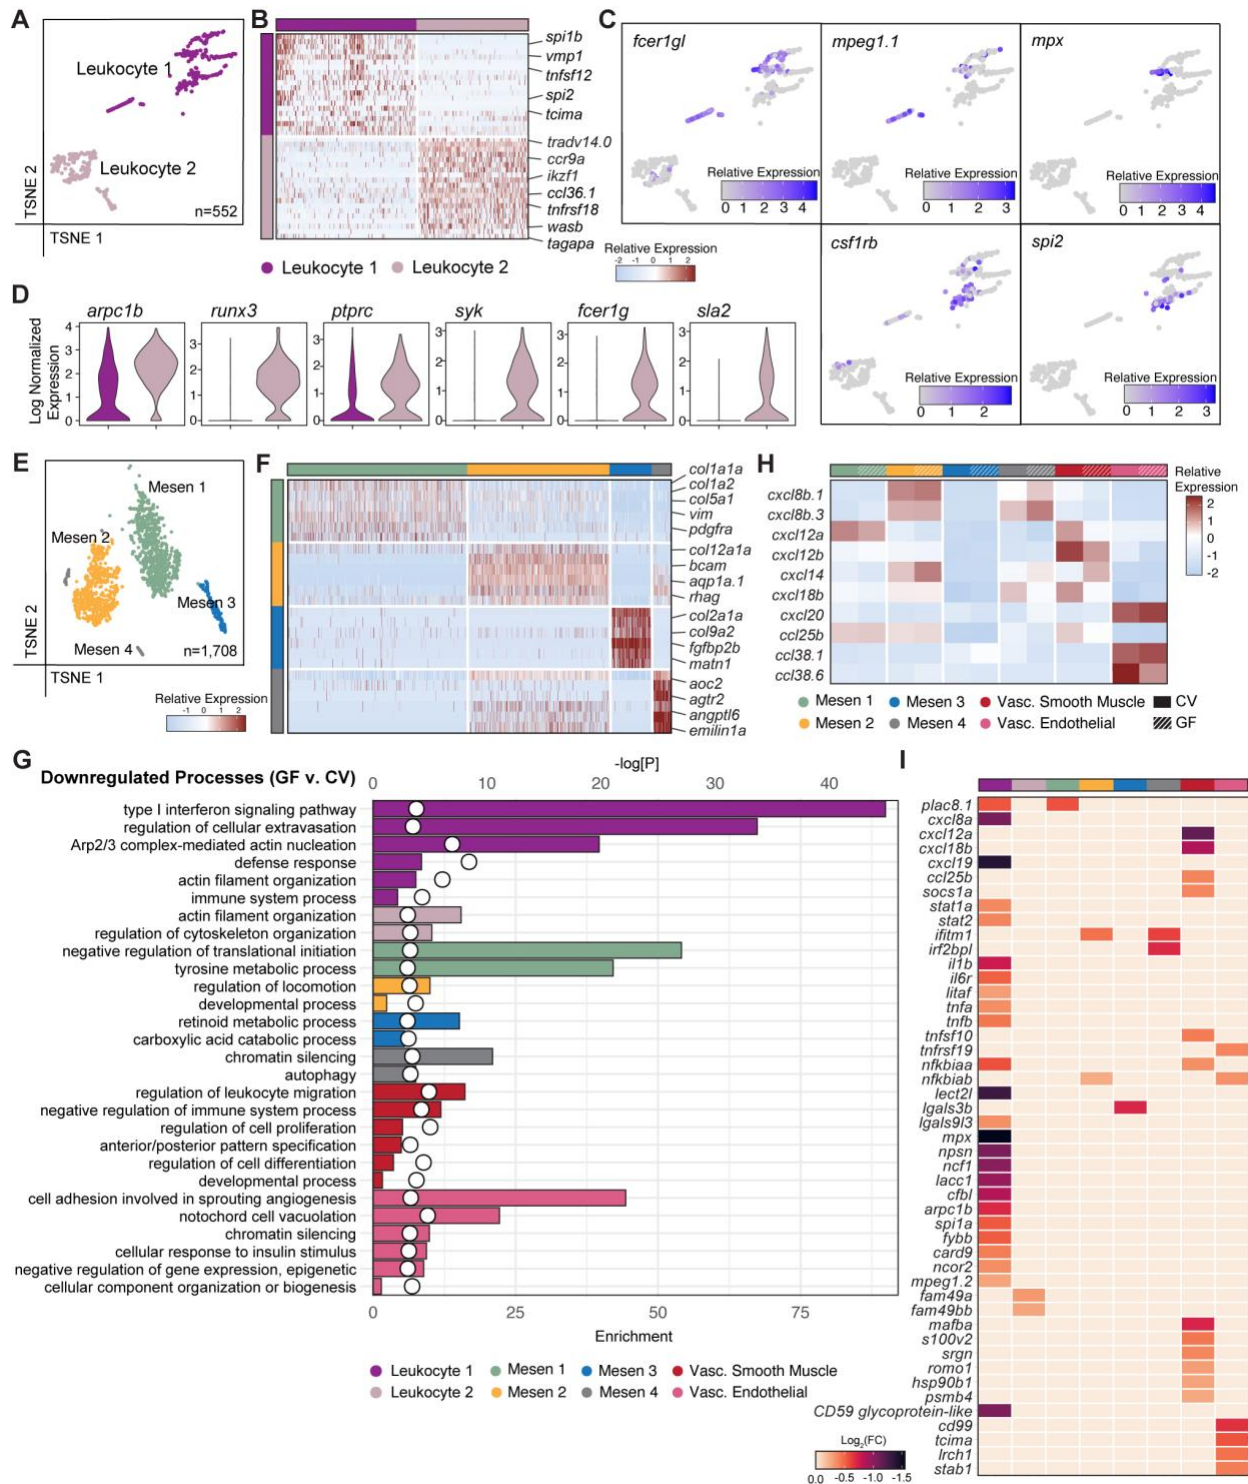

385

386 **Figure 5. Stromal and leukocyte populations have subtype-specific responses to commensal microbes.**

387 (A) t-SNE plot of leukocytes, color coded by cell cluster. (B) Heatmap of cluster markers for leukocytes,

388 colored by relative gene expression. Cell types are indicated by colored bars on the left and top. Several

389 top cluster markers relative to the other leukocyte population are shown on the right axis of the heatmap.

390 (C) t-SNE plots of leukocytes showing cell-specific expression of leukocyte subset markers. (D) Violin plots

391 showing log normalized expression of marker genes for leukocyte 2 cells. (E) t-SNE plot of color-coded  
392 mesenchymal clusters. (F) Heatmap of cluster markers for mesenchymal cells, colored by relative gene  
393 expression. Cell types are indicated by colored bars on the left and top. Several top cluster markers relative  
394 to the other mesenchymal population are shown on the right axis of the heatmap. (G) GO enrichment  
395 analysis of downregulated genes in GF relative to CV stromal and leukocyte populations. Enrichment score  
396 is represented by bar length and p-value is indicated with white circles. (H) Heatmap showing relative  
397 expression of chemokines in CV or GF stromal and leukocyte subsets. (I) Heatmap of differentially  
398 expressed immune related genes in GF relative to CV leukocyte and stromal cell populations, color coded  
399 according to  $\text{Log}_2(\text{FC})$ . All non-zero value expression changes are significant ( $p < 0.05$ ) as determined with  
400 a non-parametric Wilcoxon rank sum test.  
401

402

### 403 **The microbiome is essential for intestinal vascularization.**

404 Integrated analysis of CV and GF data revealed microbe-dependent gene expression changes in  
405 vascular endothelial and smooth muscle populations, including significantly diminished expression of  
406 vasculature developmental regulators (Fig 5G-I). Thus, we reasoned that, like mice (Reinhardt et al., 2012;  
407 Stappenbeck et al., 2002), microbes may promote zebrafish intestinal angiogenesis. A closer look at  
408 vascular cells showed that larvae raised in GF conditions expressed lower amounts of pro-angiogenic  
409 factors such as *moesin a (msna)* and *cdh5*, as well as BMP regulators involved in vascular morphogenesis  
410 (He and Chen, 2005; Mouillesseaux et al., 2016), such as *smad5* and *smad6a* (Fig. 6A). Likewise, we  
411 detected significant drops in expression of *angptl4* and transcriptional regulators *pre-B-cell leukemia*  
412 *homeobox 1a (pbx1a)* and *pbx4* in vascular smooth muscle (Fig. 5A), known regulators of vascular  
413 development (Cvejic et al., 2011; Kao et al., 2015). Combined, these data raise the possibility that GF  
414 growth has detrimental consequences for formation of gut-associated vascular tissue. Intestinal  
415 vasculogenesis commences approximately three days after fertilization (Isogai et al., 2001), a time that  
416 matches microbial colonization of the lumen. At this stage, angioblasts migrates ventrally from the  
417 posterior cardinal vein, establishing the supra-intestinal artery, and a vascular plexus that gradually  
418 resolves into a parallel series of vertical vessels and the sub-intestinal vein (Goi and Childs, 2016; Lenard  
419 et al., 2015; Nicenboim et al., 2015). The gut vasculature delivers nutrients from the intestine to the

420 hepatic portal vein, supporting growth and development. To determine if the microbiome affects  
421 intestinal vasculogenesis, we used *kdrl:mCherry* larvae to visualize the vasculature of fish that we raised  
422 in the presence, or absence of a conventional microbiome for six days (Fig. 6B-C). We did not observe  
423 effects of the microbiome on formation or spacing of the supra-intestinal artery and the sub-intestinal  
424 vein, VEGF-independent processes. In both groups, the artery and vein effectively delineated the dorsal  
425 and ventral margins of the intestine (Fig. 6B and 6C). In contrast, removal of the microbiome had  
426 significant effects on development of connecting vessels, a VEGF-dependent event. Consistent with this,  
427 we observed a near 50% reduction of intestinal *kdrl:mCherry* signal in GF larvae compared to CV  
428 counterparts (Fig. 5D). Thus, we conclude that microbial factors are essential for proper development of  
429 the zebrafish intestinal vasculature.

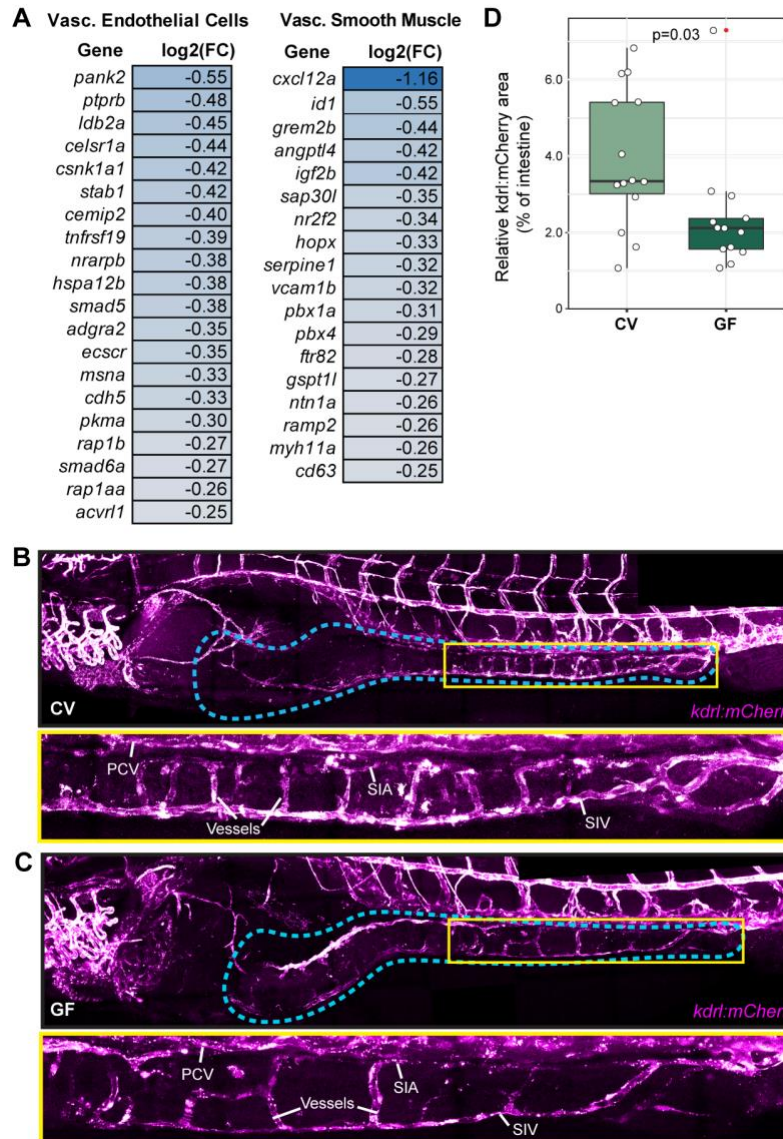

430

431 **Figure 6. Microbes promote pro-angiogenic factor expression and intestinal vasculogenesis.** (A)  
 432 Downregulated expression of pro-angiogenic factors in GF relative to CV vascular endothelial and vascular  
 433 smooth muscle populations ( $p < 0.05$ ). Significance was determined with a non-parametric Wilcoxon rank  
 434 sum test. (B-C) Expression of *kdr1:mCherry* in zebrafish 6 dpf raised under CV (B) or GF (C)  
 435 conditions. Corresponding brightfield images were used to identify the intestine, outlined in blue. Bottom panels in B  
 436 and C show enlarged region of middle to posterior intestine within yellow boxes of respective upper  
 437 panels. PCV- posterior cardinal vein; SIA- supra-intestinal artery; SIV- sub-intestinal vein. (D) Box and  
 438 whisker plot showing the area of intestinal *kdr1:mCherry* signal relative to total intestinal area.  $n=14$  and  
 439  $n=13$  for CV and GF fish respectively. Outlier is indicated with red dot. Significance was determined via  
 440 Student's *t* test.

441

442

443



444 **DISCUSSION**

445 Gut microbial factors are critical determinants of animal development (Sekirov et al., 2010).  
446 Comparative studies with CV and GF zebrafish larvae uncovered numerous microbial effects on the host,  
447 including impacts on proliferation, cell fate specification, and metabolism (Bates et al., 2006; Hooper et  
448 al., 2001; Rawls et al., 2004; Reikvam et al., 2011). Importantly, the molecular and genetic networks that  
449 determine intestinal development are highly similar between zebrafish and mammals (Davison et al.,  
450 2017; Heppert et al., 2021; Lickwar et al., 2017). Thus, discoveries made with fish have the potential to  
451 reveal foundational aspects of host-microbe relationships. However, important knowledge gaps prevent  
452 us from maximizing the value of zebrafish-microbe interaction data. In particular, we know less about  
453 cellular composition within the zebrafish intestinal epithelium compared to mice and humans. For  
454 example, the zebrafish epithelium contains basal cycling cells that likely act as epithelial progenitors  
455 (Crosnier et al., 2005; Li et al., 2020; Peron et al., 2020; Rawls et al., 2004; Wallace et al., 2005). However,  
456 we lack genetic markers that allow us to identify or isolate the progenitor population for experimental  
457 characterization. Similarly, the extent of functional heterogeneity with absorptive epithelial lineages  
458 requires clarification. To bridge these deficits, and permit cell-by-cell definition of host responses to the  
459 microbiome, we prepared single-cell atlases of the larval intestine raised under conventional or germ-free  
460 conditions. We identified thirty-five transcriptionally distinct clusters in the gut and associated tissue,  
461 including cells that have not been described to date. Comparisons between conventional and germ-free  
462 fish allowed us to delineate impacts of the microbiome on growth, patterning, immune, and metabolic  
463 processes in each cell type. We believe these findings constitute a valuable resource that will support  
464 efforts to understand how microbes influence vertebrate physiology. To make our data publicly accessible  
465 for single-cell gene expression analysis under conventional and germ-free conditions, we have uploaded  
466 our datasets to the Broad Single Cell Portal, a web-based resource for single cell visualization

467 ([https://singlecell.broadinstitute.org/single\\_cell/reviewer\\_access/87c42f87-8308-4add-ba37-54887dd1977a](https://singlecell.broadinstitute.org/single_cell/reviewer_access/87c42f87-8308-4add-ba37-54887dd1977a)).

469 Looking at the intestinal epithelium, we identified cycling cells that express classical intestinal stem  
470 cell markers, such as the Delta-like ligand *dld*, the Notch pathway components *ascl1a* and *atoh1b*, and  
471 Notch-responsive *hes-related* transcription factor family members, such as *her2* and *her15.1*. Notably,  
472 expression of several cell cycle markers, *her2*, *her15.1*, and *dld* declined in this population in GF larvae,  
473 consistent with diminished epithelial growth in fish raised in the absence of a microbiome (Bates et al.,  
474 2006; Rawls et al., 2004). Our data align with related work in vertebrates and invertebrates (Buchon et al.,  
475 2009; Cheesman et al., 2011; Rawls et al., 2004; Reikvam et al., 2011), and raise the possibility that we  
476 may have uncovered intestinal stem cell markers for zebrafish larvae. In mammals, *Lgr5* is a classical  
477 intestinal stem cell marker, with roles in Wnt signaling (Haegebarth and Clevers, 2009). Though Wnt is  
478 important for microbe-dependent intestinal epithelial growth in zebrafish (Cheesman et al., 2011), the  
479 zebrafish genome does not appear to encode an *lgr5* ortholog. Instead, the fish genome encodes related  
480 *lgr4* and *lgr6* genes (Hirose et al., 2011). We did not observe expression of *lgr6* in the fish gut and detected  
481 *lgr4* expression primarily in absorptive cells, raising the possibility that Wnt-Lgr signaling may not be  
482 essential for specification and growth of fish intestinal stem cells. In this regard, zebrafish may be more  
483 akin to *Drosophila*, where Wnt activity has ancillary roles in midgut intestinal stem cell growth (Cordero  
484 et al., 2012; Lee et al., 2009; Lin et al., 2008; Tian et al., 2016). In the future, it will be of interest to perform  
485 lineage tracing with candidate progenitor cells identified in this study to test their ability to generate a  
486 mature epithelium, and to resolve the roles of Wnt-Lgr activity in zebrafish epithelial homeostasis.

487 Separate to cycling, Notch-positive cells, we identified transcriptional markers for secretory  
488 enteroendocrine cells, and mucin-producing goblet cells (Crosnier et al., 2005; Ng et al., 2005; Wallace et  
489 al., 2005). Examination of the enteroendocrine population revealed a sophisticated arrangement of  
490 lineages that can be distinguished based on their rostro-caudal distribution and on the profile of peptide

491 hormones they produce, indicating a spatially complex pattern of hormone production within the  
492 developing intestinal epithelium. Integrated comparisons between CV and GF fish uncovered pronounced  
493 effects of the microbiome on goblet cell immune signaling. We found that gut microbes induce goblet-  
494 specific expression of the interferon-responsive transcription factor *stat2*, several interferon-inducible  
495 genes, and genes involved in leukocyte chemotaxis (*lect2l*, *saa*, *ccl19a.1*, *ccl19b*), implicating goblet cells  
496 in the coordination of host immune responses to a conventional microbiome.

497       Upon examination of differentiated lineages, we identified transcriptional signatures of regionally and  
498 spatially specialized enterocytes in CV larvae, as well as an extensive profile of gene expression in  
499 lysosome-rich enterocytes that mediate protein absorption and metabolism (Park et al., 2019). Our  
500 findings provide a molecular underpinning of the regionally controlled nature of nutrient metabolism in  
501 the zebrafish gut. Perhaps more intriguingly, we also uncovered two lineages that were unknown in  
502 zebrafish. Specifically, we identified Best4/Otop2-positive enterocytes that are likely enriched in the  
503 posterior intestinal epithelium. Best4/Otop2 cells are a minimally characterized cell type only recently  
504 discovered in the human colon (Parikh et al., 2019; Smillie et al., 2019). Given the utility of zebrafish for  
505 examination of gut development, particularly in the context of host-microbe interactions, we believe fish  
506 will be of considerable value for *in vivo* characterization of Best4/Otop2 cells. Separately, we identified  
507 cells that are enriched for expression of markers highly associated with intestinal tuft cells, including the  
508 *pou2f3* master regulator. Tuft cells are a relatively under-characterized cell type that share developmental  
509 trajectories with secretory lineages, but appear to activate mucosal type II immune responses. At present,  
510 it is unclear if zebrafish tuft-like cells are involved in mucosal defenses. Nonetheless, our identification of  
511 Best4/Otop2 and tuft-like cells within the zebrafish intestinal epithelium underscores the similarities  
512 between fish and mammalian intestines. We further note that our datasets are in broad agreement with  
513 a recent study reporting single-cell profiles for sorted zebrafish IECs (Wen et al., 2021).

514 The availability of a high-resolution transcriptional atlas of the zebrafish intestine allowed us to map  
515 microbial effects on each cell type. While it is possible that some of the cell-specific changes observed  
516 result from GF derivation, we find that our recapitulation of known microbe-responsive processes makes  
517 this unlikely to be a major confounding factor. Importantly, the resolution provided by single-cell  
518 approaches allowed us to uncover a large number of unknown microbe-driven processes in the host, and  
519 resolve each process to the level of distinct cell clusters. Our work shows that microbiota-dependent  
520 control of growth, developmental, metabolic and immune processes display remarkable cellular  
521 specificity. To provide one example, we will discuss effects of the microbiota on host immune activity;  
522 however, we note our data permit identification of microbial impacts on many physiological processes.

523 Our work revealed a hitherto unknown complexity of germline-encoded immune gene expression  
524 patterns in CV fish, suggesting a refined partitioning of immune functions among intestinal epithelial cell  
525 types. Absorptive intestinal epithelial cells expressed enriched amounts of detoxifying alkaline  
526 phosphatases (Bates et al., 2006), and myeloid-activating *serum amyloid A* (Kanther et al., 2011; Murdoch  
527 et al., 2019). In contrast, progenitor and tuft cells expressed elevated levels of the bacterial peptidoglycan  
528 sensor *nod2* and core NF- $\kappa$ B pathway elements, whereas enteroendocrine cells and leukocytes expressed  
529 larger amounts of *il22*, a cytokine that activates epithelial defenses (Dudakov et al., 2015). Phagocytes  
530 were characterized by elevated expression of pro-inflammatory cytokines such as *il1b*, *tnfa* and *tnfb*,  
531 whereas mesenchymal cells were prominent sources of immune-regulatory TGF-beta class cytokines.  
532 Comparisons between CV and GF fish uncovered a remarkable input from the microbiome on all these  
533 processes, with cell-specific expression of many immune effectors and mediators declining, relocating, or  
534 disappearing almost entirely in GF fish. Future work will be needed to elucidate impacts of cell-specific  
535 immune signals on intestinal homeostasis.

536 To test developmental consequences of microbial removal on larvae, we focused on intestinal  
537 vasculogenesis. In fish, the intestinal vasculature arises from angioblasts that migrate ventrally from the

538 posterior cardinal vein, and establish a plexus that gradually resolves into the dorsal supra-intestinal  
539 artery, the ventral sub-intestinal vein, and a series of parallel vessels that connect artery and vein (Goi  
540 and Childs, 2016; Isogai et al., 2001; Lenard et al., 2015; Nicenboim et al., 2015). We noted diminished  
541 expression of key angiogenesis regulators in GF larvae, particularly VEGF-class receptors with established  
542 roles in formation of connecting vessels (Goi and Childs, 2016). Examination of GF fish showed that the  
543 microbiota is dispensable for positioning and spacing of the artery and vein. In contrast, removal of the  
544 microbiota had deleterious effects on connecting vessels, confirming a role for the microbiome in  
545 establishing the intestinal vasculature. Our results match observations from mice, where germ-free  
546 growth also diminishes villus angiogenesis (Reinhardt et al., 2012; Stappenbeck et al., 2002), suggesting a  
547 shared requirement for microbial cues to direct intestinal angiogenesis in vertebrates. We believe the  
548 advances made in this study will allow us to trace the molecular, and cellular networks that control  
549 intestinal vasculogenesis in a developing vertebrate.

550

551

552

553

554

555

556

557

558

559

560

561

562 **ACKNOWLEDGEMENTS**

563

564 We acknowledge flow cytometry support from Dr. Aja Rieger and Sabina Baghirova, as well as support

565 with single-cell library preparation from Dr. Joaquin Lopez-Orozco. Flow Cytometry Facility Experiments

566 were performed at the University of Alberta Faculty of Medicine & Dentistry Flow Cytometry Facility,

567 which receives financial support from the Faculty of Medicine & Dentistry and Canada Foundation for

568 Innovation (CFI) awards to contributing investigators. We also acknowledge imaging help from Dr. Xuejun

569 Sun of the Department of Oncology Cell Imaging Facility and Arlene Oatway of the Department of

570 Biological Sciences Microscopy Facility at the University of Alberta. We would also like to thank Science

571 Animal Support Services at the University of Alberta for their excellent care of the zebrafish aquatics

572 facility. This work was supported by grants from the Canadian Institute of Health Research (Grant # PJT

573 159604). RJW has funding support through the University of Alberta Faculty of Graduate Studies and

574 Research, National Science and Engineering Research Council Graduate Scholarships, and Alberta

575 Innovates Graduate Student Scholarships.

576

577 **MATERIALS AND METHODS**

578 **Data Availability**

579 Cell Ranger raw output files are available from the NCBI GEO database (GSE161855). Processed data is  
580 available for visualization and analysis on the Broad Single Cell Portal (SCP1623).

581

582 **Zebrafish strains and maintenance**

583 Zebrafish were raised and maintained using protocols approved by the Animal Care & Use Committee:  
584 Biosciences at the University of Alberta, operating under the guidelines of the Canadian Council of Animal  
585 Care. TL strain zebrafish were used for single-cell RNA sequencing, Nanostring gene expression analysis,  
586 and transmission electron microscopy, and the *Tg(kdrl:mCherry)* line (Wang et al., 2010a) was used for  
587 analysis of intestinal vasculogenesis. Adult fish were raised and maintained within the University of  
588 Alberta fish facility at 28°C under a 14 hour/ 10 hour light/ dark cycle as previously described (Westerfield,  
589 2000). For larval analysis, breeding tanks were set up overnight with 1 male and 1 female separated by a  
590 divider until morning. Fish were bred for 1 hour, then embryos were collected, rinsed gently with facility  
591 water, and transferred to culture flasks (Corning) with 15 mL embryo media (EM) (prepared as in  
592 Melancon et al., 2017) and 15 embryos per flask. Embryos were raised at 29°C under a 14 hour/ 10 hour  
593 light/ dark cycle until 6 days post fertilization.

594

595 **Generating germ-free zebrafish**

596 Fish embryos were made germ-free essentially as in (Melancon et al., 2017). A clutch of embryos was  
597 collected then washed and split into two cohorts. The CV cohort was kept in sterile EM, while the GF  
598 cohort was kept in sterile EM supplemented with ampicillin (100 µg/mL), kanamycin (5 µg/mL),  
599 amphotericin B (250 ng/mL), and gentamicin (50 µg/mL). Embryos were washed every 2 hours with EM  
600 or EM plus antibiotics for CV and GF cohorts respectively. Once at 50% epiboly, the GF cohort was

601 successively washed three times in EM, then 2 minutes in 0.1% polyvinylpyrrolidone-iodine (PVP-I) in EM,  
602 followed by three EM washes, then a 20-minute incubation with 0.003% sodium hypochlorite (bleach) in  
603 EM. Embryos were washed three more times then transferred into tissue culture flasks with sterile EM.  
604 The CV cohort received the same number and duration of washes, using EM in lieu of dilute PVP-I or  
605 bleach. All work was performed in a biosafety cabinet sterilized first with 10% bleach, followed by 70%  
606 ethanol. We tested for bacterial contamination in GF flasks at 4 days post-fertilization, according to  
607 established protocol (Melancon et al., 2017). EM was collected from CV and GF culture flasks to test for  
608 bacteria by plating on TSA, as well as PCR against bacterial 16S rDNA. Parental tank water and sterile  
609 filtered water were used as a positive and negative control respectively, where bacteria were positively  
610 identified in parental tank water and confirmed absent from sterile water. CV and GF flasks with bacteria  
611 present or absent respectively were used for subsequent analysis.

612  
613

#### 614 **Imaging and quantifying intestinal vasculature**

615

616 *Tg(kdrl:mCherry)* fish (Wang et al., 2010a) were raised under CV or GF conditions for 6 dpf, then  
617 euthanized with tricaine and fixed overnight at 4 °C. Larvae were washed 3X in PBS then embedded in  
618 0.7% UltraPure low melting point agarose (Invitrogen 16520) on a glass bottom dish. Tile and Z-stack  
619 images (5 µm sections) of whole fish were captured on a Leica Falcon SP8 equipped with a 25x 0.95NA  
620 Water HC Fluotar objective lens. Images were stitched with Leica Application Suite X software (Leica) and  
621 imported to FIJI to produce maximum intensity Z-projection images that were adjusted for brightness and  
622 contrast, as well as false color manipulations. To quantify intestinal vasculature, corresponding brightfield  
623 images were used to set intestinal boundaries in FIJI. Fluorescent images were then converted to binary  
624 images and the area of kdrl:mCherry signal relative to the area of the whole intestine was measured. Box  
625 plots were generated in RStudio with ggplot2.

626



627 **Generation and analysis of transient transgenic zebrafish**

628 *Tg(tnfrsf11a:GFP)* zebrafish were generated using the Tol2kit (Kwan et al., 2007). Briefly, a 3441 base pair  
629 fragment upstream of the of the *tnfrsf11a* transcription start site was amplified by PCR from zebrafish  
630 genomic DNA, then subcloned into the 5' entry vector using KpnI and SacII restriction sites. The p5E-3.4-  
631 *tnfrsf11a* construct was confirmed via restriction digest, and gateway cloning was used to combine the 5'  
632 entry, middle entry (pME-EGFP), and 3' (p3E-polyA) entry clones into the destination vector  
633 (pDestTol2CG2). The final construct was confirmed via restriction digest. To generate transient  
634 transgenics, 1-cell stage embryos were injected with approximately 50 pg DNA and 25 pg transposase  
635 RNA. Injected embryos were raised to 6 dpf, and larvae were screened for both *cm1c2:GFP* expression and  
636 intestinal GFP signal. Positive larvae were euthanized in 5X tricaine and intestines were dissected into ice-  
637 cold 4% PFA in PBS and fixed overnight at 4°C. Guts were then washed in PBS + 0.75% Triton-X (PBT),  
638 blocked in PBT + 3% BSA (PBTB) for 1 hour, then incubated in 1° antisera (Invitrogen chicken anti-GFP,  
639 1:4000) in blocking solution overnight at 4°C. The next day, guts were washed in PBT, incubated with 2°  
640 antibody (1:1500) and Alexa Fluor™ 647 Phalloidin (Invitrogen A22287, 1:2000) in PBTB for 1 hour. Guts  
641 were then washed and counterstained with Hoechst 33258 (ThermoFisher, H3569, 1:2000 dilution) in PBT  
642 before mounting. Z stack images (0.3-0.5 mm sections) were acquired using an Olympus IX-81 spinning  
643 disc confocal equipped with a Hamamatsu EMCCD (C9100-13) camera and operated with Volocity 4. Z  
644 stack images were exported and processed in Fiji (Schindelin et al., 2012).

645

646 **Generating single-cell suspensions for single cell RNA-seq**

647  
648 Fish from the same embryo clutch were derived CV or GF as described. Five larvae were euthanized at a  
649 time in PBS plus 5X tricaine, then intestines were immediately dissected with sterilized equipment and  
650 placed into 200 µL sterile PBS in a 1.5 mL microfuge tube on ice, alternating five CV and five GF intestines  
651 until 25 intestines (replicate 1) or 55 intestines (replicate 2) were collected per condition (80 intestines

652 total per condition). Total dissection time was kept below 2 hours for each replicate. Immediately  
653 following dissections, intestines were incubated in 1.5 mL microfuge tubes with 200  $\mu$ L of dissociation  
654 cocktail containing 1 mg/mL fresh collagenase A, 40  $\mu$ g/mL proteinase k, and 0.25% trypsin in PBS for 30  
655 minutes at 37°C, pipetting up and down 40X every 10 minutes to aid digestion. Then, either (Replicate 1)  
656 ZombieAqua viability dye (BioLegend) was added at the beginning of dissociation to a final concentration  
657 of 1:1000 to stain dead and dying cells, 10% non-acetylated BSA in PBS was added to the dissociation  
658 cocktail (final concentration of 1%) to stop digestion, cells were spun for 15 minutes at 0.3 RCF and 4 °C  
659 to pellet cells, cells were gently re-suspended in 200  $\mu$ L PBS+0.04% BSA (non-acetylated) and spun down  
660 through a 40  $\mu$ m cell strainer (Pluriselect) at 0.3 RCF for 1 minute at 4 °C, then filtered cells were sorted  
661 on a BD FACS Aria III to collect live single cells (ZombieAqua negative); or (Replicate 2) 10% non-acetylated  
662 BSA in PBS was added to the dissociation cocktail (final concentration of 1%) to stop digestion, and the  
663 cells were spun for 15 minutes at 0.3 RCF and 4 °C to pellet cells. Cells were then gently re-suspended in  
664 200  $\mu$ L PBS+0.04% non-acetylated BSA and spun down through a 40  $\mu$ m cell strainer (Pluriselect) at 0.3  
665 RCF for 1 minute at 4°C. Live cells were collected using OptiPrep™ Density Gradient Medium (SIGMA,  
666 D1556-250ML). Briefly, a 40% (w/v) iodixanol working solution was prepared with 2 volumes of  
667 OptiPrep™ and 1 volume of 0.04 %BSA in 1XPBS/DEPC-treated water. This working solution was used to  
668 prepare a 22% (w/v) iodixanol solution in the same buffer. One volume of working solution was mixed  
669 with 0.45 volume of cell suspension via gentle inversion. The solution mixture was transferred to a 15ml  
670 conical tube then topped up to 6 ml with working solution. The solution was overlaid with 3 ml of the 22%  
671 (w/v) iodixanol and the 22% iodixanol layer was overlaid with 0.5 ml of PBS+0.04% BSA. Viable cells were  
672 separated by density gradient created by centrifuging at 800xg for 20 min at 20°C. Viable cells were  
673 harvested from the top interface, which was then diluted in PBS+0.04% BSA. Live cells were pelleted at  
674 0.3 RCF for 10 min at 4°C. Supernatant was decanted and cells were resuspended in PBS+0.04% BSA. (Both  
675 Replicates): Cell suspensions were then counted with a hemocytometer. Viability, as determined with

676 Trypan blue, was >95% for all CV and GF samples. The single cell suspensions were immediately run  
677 through the 10X Genomics Chromium Controller with Chromium Single Cell 3' Library & Gel Bead Kit v3.1.  
678 Libraries were constructed according to 10X Genomics Chromium Single Cell 3' Library & Gel Bead Kit v3  
679 protocol. Libraries were sent to Novogene, where QC was performed by Nanodrop for quantitation,  
680 agarose gel electrophoresis to test for library degradation/ contamination, and Agilent 2100 analysis for  
681 library integrity and quantitation. Paired-end sequencing was performed on the Illumina Hiseq platform  
682 with a read length of PE150 bp at each end.

### 683 **Processing and analysis of single cell RNA-seq data**

684  
685 For single cell analysis, Cell Ranger v3.0 (10X Genomics) was used to demultiplex raw base call files from  
686 Illumina sequencing and to align reads to the Zebrafish reference genome (Ensembl GRCz11.96). Cell  
687 Ranger output matrices were analyzed using the Seurat R package version 3.1.1 (Butler et al., 2018) in  
688 RStudio. Cells possessing fewer than 200 unique molecular identifiers (UMIs), greater than 2500 UMIs, or  
689 greater than 50% mitochondrial reads were removed to reduce the number of low-quality cells and  
690 doublets. Seurat was then used to normalize expression values and perform cell clustering on integrated  
691 datasets at a resolution of 1.0 with 26 principal components (PCs), where optimal PCs were determined  
692 using JackStraw scores (Macosko et al., 2015) and elbow plots. After using the "FindMarkers" function in  
693 Seurat to identify marker genes for each cluster, clusters were annotated according to known cell type  
694 markers in zebrafish, or orthologous markers in mammals.

695

### 696 **Gene ontology (GO) enrichment analysis**

697 Marker genes ( $p$ -value cut-off < 0.05), as well as down-regulated gene lists from the integrated dataset  
698 ( $p$ -value cut-off < 0.05) were analyzed in GOrilla (*Gene Ontology enRichment anaLysis and visualizAtion*  
699 *tool*) to determine GO term enrichment (Eden et al., 2009). Genes were analyzed in a two-list unranked

700 comparison using the whole dataset gene list as background. To remove redundant GO terms, enriched  
701 terms with associated p-values from GOrilla were run through REVIGO (REduce and Visualize Gene  
702 Ontology) using SimRel semantic similarity metric with an allowed similarity of 0.4 (Supek et al., 2011).  
703 Bar plots were manually generated using ggplot2 in RStudio.

704

#### 705 **NanoString nCounter gene expression analysis**

706 Fish from the same embryo clutch were derived CV or GF as described. Fifteen 6 dpf zebrafish were  
707 taken per flask, with four replicates per condition. Larvae were euthanized in PBS plus 5X tricaine, then  
708 intestines were immediately dissected with sterile equipment and placed into 250  $\mu$ L Trizol in a 1.5 mL  
709 microfuge tube on ice. Once 15 intestines were collected, samples were homogenized and stored at -  
710 80°C. After freezing, samples were thawed, and standard Trizol-chloroform extraction was used to  
711 isolate RNA. Sample concentrations and quality were measured on an Agilent Bioanalyzer 2100 prior to  
712 shipping to NanoString Technologies for gene expression analysis using the nCounter® Elements™  
713 platform.

714

#### 715 **16S rRNA gene sequencing**

716 Five days post fertilization, larval intestines were dissected, using aseptic technique, and collected in 200  
717  $\mu$ L of Microbead Solution. A total of thirty guts were collected, with ten guts pooled per replicate. The  
718 MoBio UltraClean Microbial DNA Isolation kit (Cat No. 12224-250) was used to extract microbial DNA. To  
719 assess the intestinal bacterial community composition, the V4 variable region of the 16s rRNA gene  
720 encompassed by the 515 forward primer and 806 reverse primer was sequenced. Quality control and  
721 sequencing was performed by Novogene Corporation using illumina Novaseq Platform PE250. Sequences  
722 were processed with QIIME2-2019.10 (qiime2.org). The DADA2 pipeline was used to join paired-end  
723 reads, remove chimeric sequences, and to generate the feature table used to resolve amplicon sequence

724 variants using default parameters. DADA2 denoising resulted in 468,380 reads. Amplicon sequence  
725 variants (ASVs) represented by fewer than 200 reads across all samples were removed. A naïve Bayes  
726 classifier trained on SILVA132\_99% full-length reference sequences was used to assign taxonomy.  
727 Taxonomy assignments were verified using NCBI blast. The sequence table was then filtered to exclude  
728 any sequences that were unassigned, not assigned past phylum level, or assigned as eukaryota, resulting  
729 in 441,712 sequences corresponding to 59 unique features.

730

### 731 **Transmission electron microscopy of adult zebrafish intestines**

732 Adult fish were euthanized and dissected in accordance with protocols approved by the Animal Care &  
733 Use Committee: Biosciences at the University of Alberta, operating under the guidelines of the Canadian  
734 Council of Animal Care. To prepare samples for TEM, the posterior intestine was isolated and fixed in 2.5%  
735 glutaraldehyde, 2% PFA and 0.1M phosphate buffer solution for several days. Samples were then washed  
736 in 0.1M phosphate buffer, treated in 1% osmium tetroxide in 0.1M phosphate buffer, followed by  
737 additional washes. Intestines were subsequently dehydrated through a graded ethanol series, followed  
738 by infiltration with Spurr's resin. Infiltrated samples were then embedded in flat molds in Spurr's resin  
739 and cured overnight at 70°C. Blocks were then sectioned (70-90 nm thickness) on a Reichert-Jung UltracutE  
740 Ultramicrotome, and sections were stained with uranyl acetate, followed by lead citrate. Images were  
741 acquired using a FEI-Philips Morgagni 268 Transmission Electron Microscope operating at 80 kV and  
742 equipped with a Gatan Orius CCD camera.

743

744

745

746

747

748 **SUPPLEMENTARY MATERIAL**

749

750 **Table S1. Single cell dataset composition and identifiers.**

751

| Cell Type         | Condition | Captured Cells | Proportion of Dataset (%) | Top 5 Markers                                                |
|-------------------|-----------|----------------|---------------------------|--------------------------------------------------------------|
| Progenitor-like 1 | CV        | 164            | 2.04                      | dld, her15.2, atoh1b, her15.1, dla                           |
|                   | GF        | 154            | 1.49                      | dld, her15.2, gig2h, her15.1, dla                            |
| Progenitor-like 2 | CV        | 83             | 1.03                      | si:dkey-96g2.1, zgc:193726, zgc:113142, stm, si:rp71-17i16.6 |
|                   | GF        | 149            | 1.44                      | si:dkey-96g2.1, zgc:193726, zgc:113142, stm, si:rp71-17i16.6 |
| Endocrine 1       | CV        | 202            | 2.51                      | ccka, si:zfos-2372e4.1, insl5a, scg3, si:ch73-359m17.9       |
|                   | GF        | 254            | 2.46                      | ccka, egr4, insl5a, scg3, si:ch73-359m17.9                   |
| Endocrine 2       | CV        | 102            | 1.27                      | pnoca, scgn, scg3, scg5, slc45a2                             |
|                   | GF        | 85             | 0.82                      | pnoca, scgn, scg3, scg5, pax6b                               |
| Tuft-like         | CV        | 151            | 1.88                      | gng13a, calb2a, ponzr6, gnb3a, rgs1                          |
|                   | GF        | 68             | 0.65                      | gng13a, calb2a, ponzr6, gnb3a, rgs1                          |
| Goblet 1          | CV        | 445            | 5.53                      | si:ch211-153b23.5, lect2l, malb, si:ch211-139a5.9, cldnh     |
|                   | GF        | 785            | 7.61                      | si:ch211-153b23.5, malb, si:ch211-139a5.9, cldnh, ponzr1     |
| Goblet 2          | CV        | 120            | 1.49                      | si:ch211-153b23.5, cldnh, si:ch211-139a5.9, krt92, cnfn      |
|                   | GF        | 414            | 4.02                      | si:ch211-153b23.5, cldnh, si:ch211-139a5.9, krt92, cnfn      |
| Goblet-like       | CV        | 276            | 3.43                      | tcnba, cnfn, zgc:92380, CABZ01068499.1, s100a10b             |
|                   | GF        | 248            | 2.41                      | tcnba, cnfn, zgc:92380, basp1, s100a10b                      |
| EC1               | CV        | 519            | 6.46                      | apoa1a, chia.2, fabp2, rbp2a, apoa4b.2.1                     |
|                   | GF        | 841            | 8.16                      | apoa1a, chia.2, fabp2, rbp2a, fabp1b.1                       |
| EC2               | CV        | 360            | 4.48                      | chia.1, chia.2, fabp1b.1, apoa4b.2.1, apoa1a                 |
|                   | GF        | 470            | 4.56                      | chia.1, chia.2, fabp1b.1, apoa4b.2.1, fabp2                  |
| EC3               | CV        | 660            | 8.21                      | si:ch211-142d6.2, elovl2, mogat2, lta4h, sult1st3            |
|                   | GF        | 568            | 5.51                      | si:ch211-142d6.2, elovl2, mogat2, lta4h, sult1st3            |
| EC4               | CV        | 607            | 7.55                      | anpepb, mep1b, mep1a.1, si:dkey-219e21.2, clca1              |
|                   | GF        | 660            | 6.40                      | anpepb, mep1b, mep1a.1, si:dkey-219e21.2, clca1              |
| EC5               | CV        | 165            | 2.05                      | tmprss15, neu3.3, si:ch211-113d11.6, pdx1, tcnba             |

|                        |    |     |      |                                                                   |
|------------------------|----|-----|------|-------------------------------------------------------------------|
|                        | GF | 134 | 1.30 | tmprss15, neu3.3, si:ch211-113d11.6, pdx1, meis1a                 |
| LRE 1                  | CV | 64  | 0.80 | si:dkey-194e6.1, pdzk1ip1, lrp2a, slc5a12, mfsd4ab                |
|                        | GF | 67  | 0.65 | lrp2a, slc5a12, mfsd4ab, slc22a7b.1, slc13a3                      |
| LRE 2                  | CV | 39  | 0.49 | ctsbb, dab2, fabp6, lrp2b, mtbl                                   |
|                        | GF | 55  | 0.68 | ctsbb, dab2, fabp6, slc15a2, si:ch211-214j8.1                     |
| Best4/Otop2            | CV | 98  | 1.22 | otop2, cftr, ptger4c, tacr2, best4                                |
|                        | GF | 106 | 1.03 | otop2, cftr, ptger4c, tacr2, best4                                |
| Mesenchymal 1          | CV | 494 | 6.15 | zgc:153704, si:ch211-106h4.12, si:ch211-251b21.1, col1a1a, pmp22a |
|                        | GF | 311 | 3.02 | zgc:153704, si:ch211-106h4.12, si:ch211-251b21.1, col1a1a, col5a1 |
| Mesenchymal 2          | CV | 352 | 4.38 | aqp1a.1, podxl, cavin2b, cavin1b, rhag                            |
|                        | GF | 285 | 2.76 | aqp1a.1, podxl, cavin2b, cavin1b, rhag                            |
| Mesenchymal 3          | CV | 134 | 1.67 | fgfbp2b, col2a1a, matn1, cnmd, col9a2                             |
|                        | GF | 50  | 0.49 | fgfbp2b, col2a1a, matn1, cnmd, col9a2                             |
| Mesenchymal 4          | CV | 41  | 0.51 | colec10, colec11, agtr2, angptl6, cidea                           |
|                        | GF | 41  | 0.40 | colec10, colec11, agtr2, angptl6, lh9                             |
| Muscle                 | CV | 68  | 0.85 | actc1b, mylpfa, nme2b.2, tnnt3b, pvalb4                           |
|                        | GF | 54  | 0.52 | mylpfa, nme2b.2, tnnt3b, mylz3, tnni2a.1                          |
| Vascular Smooth Muscle | CV | 236 | 2.93 | tagln, acta2, BX088707.3, mylkb, desmb                            |
|                        | GF | 232 | 2.25 | tagln, acta2, BX088707.3, mylkb, desmb                            |
| Vascular Endothelial   | CV | 146 | 1.82 | cdh5, plvapb, kdrl, fgd5a, clec14a                                |
|                        | GF | 134 | 1.30 | cdh5, plvapb, kdrl, fgd5a, clec14a                                |
| Leukocyte 1            | CV | 163 | 2.02 | fcgr1g, si:dkey-5n18.1, si:ch211-147m6.1, si:ch211-194m7.3, spi1b |
|                        | GF | 146 | 1.42 | fcgr1g, si:dkey-5n18.1, si:ch211-147m6.1, si:ch211-194m7.3, spi1b |
| Leukocyte 2            | CV | 129 | 1.61 | ccl36.1, ccl38.6, ccl20a.3, ccr9a, coro1a                         |
|                        | GF | 114 | 1.11 | ccl36.1, ccl38.6, ccr9a, coro1a, CR753876.1                       |
| Neuronal               | CV | 28  | 0.35 | elavl4, elavl3, sncb, phox2a, phox2bb                             |
|                        | GF | 51  | 0.49 | elavl4, elavl3, sncb, phox2a, phox2bb                             |
| Hepatocytes 1          | CV | 358 | 4.45 | hamp, ces2, serpina1l, si:dkeyp-73d8.9, fgg                       |
|                        | GF | 497 | 4.82 | hamp, ces2, serpina1l, si:dkeyp-73d8.9, fgg                       |
| Hepatocytes 2          | CV | 312 | 3.88 | hpda, si:dkey-86l18.10, ambp, zgc:112265, c3a.1                   |
|                        | GF | 558 | 5.41 | hpda, si:dkey-86l18.10, ambp, zgc:112265, c3a.1                   |
| Hepatocytes 3          | CV | 356 | 4.43 | gc, serpina1, apom, zgc:123103, serpina1l                         |
|                        | GF | 994 | 9.64 | gc, serpina1, zgc:123103, serpina1l, tfa                          |
| Acinar 1               | CV | 191 | 2.38 | prss1, ctrb1, prss59.2, CELA1 (1 of many), prss59.1               |

|             |    |     |      |                                                                      |
|-------------|----|-----|------|----------------------------------------------------------------------|
|             | GF | 802 | 7.78 | prss1, ctrb1, prss59.2, CELA1 (1 of many), prss59.1                  |
| Acinar 2    | CV | 220 | 2.74 | si:ch211-240l19.5, cel.2, CELA1 (1 of many).5, pdia2, c6ast3         |
|             | GF | 316 | 3.07 | si:dkey-14d8.7, si:ch211-240l19.5, cel.2, CELA1 (1 of many).5, pdia2 |
| Acinar 3    | CV | 183 | 2.28 | pla2g1b, si:ch211-240l19.5, cpa4, si:dkey-14d8.7, cel.2              |
|             | GF | 289 | 2.80 | pla2g1b, si:ch211-240l19.5, cpa4, si:dkey-14d8.7, cel.2              |
| Epidermis 1 | CV | 127 | 1.58 | krt1-19d, ponzr5, zgc:165423, icn2, anxa1c                           |
|             | GF | 111 | 1.08 | krt1-19d, ponzr5, zgc:165423, icn2, anxa1c                           |
| Epidermis 2 | CV | 246 | 3.06 | cldni, aqp3a, cxl34b.11, col4a5, si:rp71-77l1.1                      |
|             | GF | 117 | 1.13 | cldni, aqp3a, cxl34b.11, col4a5, si:rp71-77l1.1                      |
| Epidermis 3 | CV | 197 | 2.45 | cyt1l, krt17, zgc:111983, cyt1, si:dkey-247k7.2                      |
|             | GF | 119 | 1.15 | cyt1l, krt17, zgc:111983, cyt1, si:dkey-247k7.2                      |

752

753

754

755

756

757

758

759

760

761

762

763

764

765

766

767

768

769

770

771

772

773

774

775



776  
777  
778  
779

**Table S2. Classification of 16S rRNA gene sequence datasets.** Relative abundance is shown after removal of taxa that were <1% abundant.

| Phylum | Firmicutes |                  | Proteobacteria   |              |                  |                  |                        |                  |              |
|--------|------------|------------------|------------------|--------------|------------------|------------------|------------------------|------------------|--------------|
|        | Bacilli    |                  | ?-proteobacteria |              | ?-proteobacteria |                  |                        |                  |              |
| Order  | Bacillales | Lacto-bacillales | Aceto-bacterales | Rhizo-biales | Aeromo-nadales   | Alteromo-nadales | Betaproteo-bacteriales | Pseudo-monadales | Vibrio-nales |
| CV1    | 0.78       | 6.20             | 4.91             | 0.25         | 0.72             | 0.46             | 0.84                   | 1.64             | 84.21        |
| CV2    | 1.07       | 22.25            | 6.26             | 2.90         | 12.32            | 2.71             | 4.09                   | 12.37            | 36.03        |
| CV3    | 0.56       | 35.06            | 2.76             | 1.18         | 3.75             | 2.28             | 4.67                   | 6.06             | 43.69        |

780  
781

782 **Table S3.** Description of 16s rRNA gene sequencing datasets used in this study and associated metadata.  
783

| Sample Name | # Input Reads | Reads post-filtration | Target | 515F-Primer             | 816R-Primer              | Barcode-F | Barcode-R |
|-------------|---------------|-----------------------|--------|-------------------------|--------------------------|-----------|-----------|
| CV1         | 174987        | 153739                | 16S-V4 | GTGCCAGCM<br>GCCGCGGTAA | GGACTACHVG<br>GGTWTCTAAT | CCAACA    | CGATGT    |
| CV2         | 163143        | 148080                |        |                         |                          | CCAACA    | TGACCA    |
| CV3         | 172703        | 139893                |        |                         |                          | CCAACA    | GCCAAT    |

784  
785

786  
787  
788  
789  
790  
791

**Table S4. Microbe-responsive genes exhibit cell-specific changes upon bacterial colonization.** Cell-type specific transcriptional changes are shown for genes whose expression changed in GF relative to both conventionally reared (CONR) and GF animals conventionalized at 3 dpf (CONV), as reported in Rawls et al., 2004.

| Gene            | Accession (Rawls et al., 2004) | Direction of change in Rawls et al., 2004 (GF v. CONR and GF v. CONV) | Cell type ( $\log_2FC$ , $p < 0.05$ ) (This study)                                                                                                                                                                                                                                                                           |
|-----------------|--------------------------------|-----------------------------------------------------------------------|------------------------------------------------------------------------------------------------------------------------------------------------------------------------------------------------------------------------------------------------------------------------------------------------------------------------------|
| <i>cpt1b</i>    | BI475933                       | Up                                                                    | Hepatocyte 1 (0.09), Goblet 1 (0.07)                                                                                                                                                                                                                                                                                         |
| <i>tat</i>      | AI522688                       | Up                                                                    | Acinar 1 (0.41), Acinar 2 (0.35), Leukocyte 1 (0.50), Epidermis 3 (0.23), Endocrine 1 (0.62), Endocrine 2 (0.32), Tuft-like (0.59), Goblet 1 (0.04), Goblet 2 (0.34), Goblet-like (0.29), EC1 (0.23), EC2 (0.05), EC4 (0.07), LRE1 (0.46), Mesen 2 (0.33), Vascular Endothelial (0.48), Neuronal (0.85), Hepatocyte 2 (0.21) |
| <i>slc7a3a</i>  | AI721361                       | Up                                                                    | Acinar 3 (-0.06), Endocrine 0 (-0.12), Goblet 1 (0.12), EC4 (0.11), Hepatocyte 1 (-0.08)                                                                                                                                                                                                                                     |
| <i>rcl1</i>     | AW059073                       | Up                                                                    | EC4 (0.03), Hepatocyte 1 (0.08), Hepatocyte 2 (0.10)                                                                                                                                                                                                                                                                         |
| <i>ca5a</i>     | AI617291                       | Up                                                                    | Endocrine 2 (-0.23)                                                                                                                                                                                                                                                                                                          |
| <i>arg2</i>     | AW018735                       | Up                                                                    | Endocrine 4 (-0.46), EC4 (0.23), Hepatocyte 1 (-0.12), Epidermis 3 (-0.18), Endocrine 0 (-0.59)                                                                                                                                                                                                                              |
| <i>pnp5a</i>    | AW019173                       | Up                                                                    | Goblet 1 (-0.26), EC4 (-0.09), Hepatocyte 1 (-0.12), Hepatocyte 3 (-0.21)                                                                                                                                                                                                                                                    |
| <i>ddx21</i>    | AW154620                       | Up                                                                    | EC2 (0.10), EC4 (0.13), LRE2 (0.65), Best4/Otop2 (0.25), Acinar 1 (-0.48), Vascular Smooth Muscle (-0.32), Epidermis 2 (-0.42), Goblet 1 (0.19)                                                                                                                                                                              |
| <i>spink2.1</i> | BI708320                       | Up                                                                    | EC2 (0.18), EC4 (0.32), EC5 (-0.21), Mesen 1 (-0.17), Hepatocyte 1 (-0.17), Hepatocyte 2 (-0.15), Acinar 3 (0.02), Epidermis 2 (-0.34), Epidermis 3 (-0.10), Endocrine 0 (-0.34), Endocrine 4 (-0.62), Endocrine 5 (-0.51), Tuft-like (-0.60), Goblet 1 (-0.08), Goblet 2 (-0.48)                                            |
| <i>hbp1</i>     | AW282104                       | Up                                                                    | Mesen 1 (-0.22), Mesen 3 (-0.44), Hepatocyte 1 (-0.05), Endocrine 2 (-0.35)                                                                                                                                                                                                                                                  |
| <i>nbr1a</i>    | BI866377                       | Up                                                                    | Vascular Endothelial (-0.40)                                                                                                                                                                                                                                                                                                 |
| <i>upp2</i>     | BI877640                       | Up                                                                    | Hepatocyte 1 (-0.25), Hepatocyte 2 (-0.22), Progenitor 3 (0.25)                                                                                                                                                                                                                                                              |
| <i>acp2</i>     | AW175388                       | Up                                                                    | None                                                                                                                                                                                                                                                                                                                         |
| <i>znf395b</i>  | BI476367                       | Up                                                                    | Goblet 1 (0.06), EC3 (0.02), EC4 (0.08), Mesen 2 (-0.07), Neuronal (-0.61)                                                                                                                                                                                                                                                   |
| <i>ldhbb</i>    | BI983171                       | Up                                                                    | Hepatocyte 1 (-0.07)                                                                                                                                                                                                                                                                                                         |
| <i>nsa2</i>     | AW202826                       | Up                                                                    | Hepatocyte 2 (-0.21), Acinar 3 (-0.10), Vascular smooth muscle (-0.29), Muscle (-0.26), Progenitor 2 (-0.36), Goblet 1 (0.20), EC3 (0.07), EC4 (0.33), LRE2 (1.11), Vascular Endothelial (-0.58)                                                                                                                             |
| <i>cidec</i>    | AI974197                       | Up                                                                    | Hepatocyte 2 (0.05), LRE2 (0.29), Hepatocyte 1 (0.05)                                                                                                                                                                                                                                                                        |
| <i>gfra1a</i>   | AF329854                       | Up                                                                    | Endocrine 1 (-0.40), Mesen 2 (-0.10)                                                                                                                                                                                                                                                                                         |

|                          |          |      |                                                                                                                                                                                                                                                                                                                                                     |
|--------------------------|----------|------|-----------------------------------------------------------------------------------------------------------------------------------------------------------------------------------------------------------------------------------------------------------------------------------------------------------------------------------------------------|
| <i>scel</i>              | BI707054 | Up   | Endocrine 3 (0.40), Goblet 1 (0.19), Epidermis 1 (-0.39), Epidermis 3 (-0.22)                                                                                                                                                                                                                                                                       |
| <i>cbsb</i>              | BI879550 | Up   | Endocrine 0 (-0.36), Endocrine 5 (-0.21), Goblet 1 (-0.03), EC2 (0.05), Epidermis 1 (-0.37)                                                                                                                                                                                                                                                         |
| <i>tob1b</i>             | AI666878 | Up   | Goblet 1 (0.14), EC5 (0.23), Mesen 1 (-0.24), Mesen 2 (-0.14), Hepatocyte 1 (-0.16), Vascular smooth muscle (-0.28), Muscle (-0.35)                                                                                                                                                                                                                 |
| <i>slc25a33</i>          | BI673511 | Up   | Neuronal (-0.60), Hepatocyte 1 (-0.20), Hepatocyte 3 (-0.20), Acinar 3 (-0.003), Epidermis 3 (-0.06), Goblet 1 (-0.04), EC2 (0.004), EC4 (0.02), LRE1 (-0.35)                                                                                                                                                                                       |
| <i>hebp2</i>             | BM183918 | Both | Epidermis 3 (-0.17)                                                                                                                                                                                                                                                                                                                                 |
| <i>sqstm1</i>            | AW343560 | Up   | Tuft-like (-0.61), EC1 (0.12), EC3 (-0.03), EC4 (0.08), Hepatocyte 2 (0.19)                                                                                                                                                                                                                                                                         |
| <i>nr5a2</i>             | AF327373 | Up   | Best4/Otop2 (0.20), Acinar 3 (-0.06)                                                                                                                                                                                                                                                                                                                |
| <i>ulk2</i>              | BG306394 | Up   | Vascular smooth muscle (-0.19), Epidermis 1 (-0.54), Epidermis 2 (-0.16), LRE1 (-0.15), Mesen 1 (-0.33), Neuronal (-0.86), Hepatocyte 1 (-0.32), Hepatocyte 2 (-0.24), Acinar 3 (-0.07)                                                                                                                                                             |
| <i>diabloa</i>           | BM104651 | Up   | Epidermis 3 (0.46), EC1 (-0.15), EC4 (0.08), LRE1 (-0.62), Neuronal (0.84), Hepatocyte 1 (-0.04), Hepatocyte 3 (-0.16), Acinar 1 (-0.22)                                                                                                                                                                                                            |
| <i>blzf1</i>             | BM104315 | Up   | None                                                                                                                                                                                                                                                                                                                                                |
| <i>slc15a2</i>           | AW154070 | Up   | Goblet 1 (-0.10), LRE1 (-0.16), LRE2 (1.01)                                                                                                                                                                                                                                                                                                         |
| <i>bcat1</i>             | BG308582 | Up   | None                                                                                                                                                                                                                                                                                                                                                |
| <i>aif1l</i>             | BG303835 | Up   | EC2 (0.08), EC3 (0.07), EC4 (0.23), EC5 (-0.07), Leukocyte 1 (-0.76), Progenitor 3 (-0.50)                                                                                                                                                                                                                                                          |
| <i>pcmttd1</i>           | AW116521 | Up   | EC5 (0.06), Mesen 4 (0.37)                                                                                                                                                                                                                                                                                                                          |
| <i>ptgdsb.1</i>          | BE017457 | Both | Neuronal (-0.37), Hepatocyte 1 (-0.06), Hepatocyte 2 (-0.15), Acinar 1 (-0.98), Acinar 2 (-0.43), Acinar 3 (-0.08), Vascular smooth muscle (-0.23), Muscle (-0.63), Epidermis 1 (-0.34), Epidermis 2 (-1.47), Epidermis 3 (-0.93), Progenitor 1 (-0.77), Endocrine 0 (-0.59), Endocrine 3 (-0.48), Endocrine 4 (-0.95), EC3 (0.19), Mesen 1 (-0.49) |
| <i>slc34a2b</i>          | AW343846 | Up   | Progenitor 0 (-0.15)                                                                                                                                                                                                                                                                                                                                |
| <i>mkrn1</i>             | AF277173 | Up   | Goblet 1 (0.12), EC3 (0.05), EC5 (0.07)                                                                                                                                                                                                                                                                                                             |
| <i>si:ch211-110p13.9</i> | AI588440 | Up   | None                                                                                                                                                                                                                                                                                                                                                |
| <i>pah</i>               | AW421213 | Up   | Hepatocyte 2 (0.13)                                                                                                                                                                                                                                                                                                                                 |
| <i>tab1</i>              | BI981448 | Up   | None                                                                                                                                                                                                                                                                                                                                                |
| <i>tp53inp1</i>          | BG308520 | Up   | LRE1 (-0.32), Mesen 3 (-0.27), Acinar 2 (-0.02)                                                                                                                                                                                                                                                                                                     |
| <i>irs2b</i>             | BI866297 | Up   | Mesen 2 (-0.18), Mesen 3 (-0.45), Hepatocyte 1 (0.15), Hepatocyte 2 (-0.005), Epidermis 3 (-0.17), Goblet 1 (0.15)                                                                                                                                                                                                                                  |
| <i>fhl1b</i>             | BI707602 | Up   | Hepatocyte 1 (-0.12), Hepatocyte 2 (0.003), Progenitor 2 (-0.17), Goblet 2 (0.28), EC5 (0.20)                                                                                                                                                                                                                                                       |
| <i>ccdc106a</i>          | BI877561 | Up   | None                                                                                                                                                                                                                                                                                                                                                |
| <i>zgc:77439</i>         | BG304220 | Up   | None                                                                                                                                                                                                                                                                                                                                                |
| <i>scpep1</i>            | BI891195 | Up   | Epidermis 3 (-0.10), Endocrine 3 (-0.10)                                                                                                                                                                                                                                                                                                            |
| <i>slc13a5a</i>          | AW019603 | Up   | Endocrine 5 (-0.12), EC3 (0.04), EC4 (0.09), LRE1 (-0.31)                                                                                                                                                                                                                                                                                           |
| <i>pvalb2</i>            | AF180888 | Up   | None                                                                                                                                                                                                                                                                                                                                                |

|                          |          |      |                                                                                                                                                                                                                                                                                   |
|--------------------------|----------|------|-----------------------------------------------------------------------------------------------------------------------------------------------------------------------------------------------------------------------------------------------------------------------------------|
| <i>exosc1</i>            | AI353437 | Up   | None                                                                                                                                                                                                                                                                              |
| <i>badb</i>              | AI626450 | Up   | Hepatocyte 1 (-0.03)                                                                                                                                                                                                                                                              |
| <i>tsg101a</i>           | AW115526 | Up   | Endocrine 3 (-0.27)                                                                                                                                                                                                                                                               |
| <i>dao.1</i>             | AI958489 | Both | None                                                                                                                                                                                                                                                                              |
| <i>kdm4aa</i>            | AW077952 | Up   | EC4 (0.05), LRE2 (0.35)                                                                                                                                                                                                                                                           |
| <i>caprin1b</i>          | AW116360 | Up   | Goblet 1 (0.15), EC3 (0.04), EC4 (0.07), LRE1 (-0.40), LRE2 (-0.02), Mesen 2 (-0.22), Vascular Endothelial (-0.18), Hepatocyte 2 (0.04), Vascular smooth muscle (-0.33), Epidermis 2 (-0.41), Epidermis 3 (-0.26), Progenitor 1 (-0.76), Endocrine 0 (-0.14), Endocrine 2 (-0.18) |
| <i>cyp2k6</i>            | AF283813 | Up   | None                                                                                                                                                                                                                                                                              |
| <i>irs2a</i>             | BI885475 | Up   | EC2 (0.10), EC3 (0.05), EC4 (0.09), EC5 (0.13), Acinar 3 (-0.02)                                                                                                                                                                                                                  |
| <i>cpt1aa</i>            | BM154668 | Up   | Endocrine 3 (-0.28)                                                                                                                                                                                                                                                               |
| <i>si:dkey-19a16.7</i>   | AI436876 | Up   | None                                                                                                                                                                                                                                                                              |
| <i>cox6a2</i>            | AI106216 | Up   | Goblet 1 (-0.25), EC1 (0.13), EC2 (0.31), EC3 (0.24), EC4 (0.19), EC5 (0.10), LRE1 (-0.34), Best4/Otop2 (0.21), Hepatocyte 1 (0.21), Hepatocyte 2 (0.09), Progenitor 2 (0.19)                                                                                                     |
| <i>mat2aa</i>            | BM154718 | Up   | Epidermis 2 (-0.61)                                                                                                                                                                                                                                                               |
| <i>nr1d2a</i>            | BI879764 | Up   | Epidermis 2 (-0.01), Progenitor 0 (-0.49), Progenitor 2 (-0.20), EC5 (-0.08), Mesen 2 (-0.08), Vascular smooth muscle (-0.30)                                                                                                                                                     |
| <i>slc38a4</i>           | BM095174 | Up   | Epidermis 3 (0.01), Goblet 1 (0.06), Hepatocyte 3 (-0.22)                                                                                                                                                                                                                         |
| <i>cyp27a1.4</i>         | AI477651 | Up   | None                                                                                                                                                                                                                                                                              |
| <i>lpin1a</i>            | BG884450 | Up   | None                                                                                                                                                                                                                                                                              |
| <i>si:ch211-160d14.9</i> | AI396666 | Up   | None                                                                                                                                                                                                                                                                              |
| <i>mcmdc2</i>            | AI601783 | Up   | None                                                                                                                                                                                                                                                                              |
| <i>pdpk1a</i>            | AW281842 | Down | EC3 (0.01), Progenitor 2 (-0.37)                                                                                                                                                                                                                                                  |
| <i>snrnp200</i>          | AI979356 | Down | Epidermis 2 (0.28), Hepatocyte 1 (0.06), Hepatocyte 2 (0.11), Leukocyte 1 (0.23)                                                                                                                                                                                                  |
| <i>nucks1b</i>           | AI958945 | Down | Goblet 1 (0.06), EC3 (0.02), Mesen 2 (-0.10), Mesen 4 (-0.50), Hepatocyte 2 (0.08)                                                                                                                                                                                                |
| <i>msna</i>              | BI891332 | Down | Vascular Endothelial (-0.33), Vascular smooth muscle (-0.25), Leukocyte 2 (-0.24), Progenitor 3 (-0.62)                                                                                                                                                                           |
| <i>tars</i>              | AI641018 | Down | None                                                                                                                                                                                                                                                                              |
| <i>EIF5B</i>             | AI793889 | Down | Vascular Endothelial (-0.22), Progenitor 2 (-0.21), Goblet 1 (0.11)                                                                                                                                                                                                               |
| <i>rab5if</i>            | AW154324 | Down | Hepatocyte 1 (-0.09), Goblet 1 (-0.13)                                                                                                                                                                                                                                            |
| <i>PPP4R2B</i>           | AJ243959 | Down | Hepatocyte 1 (0.02), Endocrine 3 (-0.10)                                                                                                                                                                                                                                          |
| <i>GCShb</i>             | AW019758 | Down | Hepatocyte 3 (-0.23), Endocrine 4 (-0.36), EC2 (0.23), EC3 (0.05), EC5 (-0.13), Hepatocyte 1 (-0.08)                                                                                                                                                                              |
| <i>PSMD12</i>            | AI721511 | Down | Leukocyte 2 (-0.18), Best4/Otop2 (-0.05)                                                                                                                                                                                                                                          |
| <i>PSME3</i>             | AF195050 | Down | Hepatocyte 1 (-0.01)                                                                                                                                                                                                                                                              |
| <i>apoba</i>             | AI722334 | Down | EC2 (0.04), LRE1 (0.73)                                                                                                                                                                                                                                                           |
| <i>cbwd</i>              | AI942567 | Down | None                                                                                                                                                                                                                                                                              |
| <i>IMPDH2</i>            | AI794373 | Down | None                                                                                                                                                                                                                                                                              |
| <i>ARPP19B</i>           | BM183630 | Down | None                                                                                                                                                                                                                                                                              |

|                   |          |      |                                                                                                                                                                                                                     |
|-------------------|----------|------|---------------------------------------------------------------------------------------------------------------------------------------------------------------------------------------------------------------------|
| <i>tspan1</i>     | BI672136 | Down | None                                                                                                                                                                                                                |
| <i>phb</i>        | BI880695 | Down | EC5 (0.11)                                                                                                                                                                                                          |
| <i>cbx1a</i>      | BI886353 | Down | Hepatocyte 1 (0.06)                                                                                                                                                                                                 |
| <i>tpm3</i>       | BI876589 | Down | Hepatocyte 2 (0.05), Acinar 3 (-0.04), Mesen 2 (-0.08)                                                                                                                                                              |
| <i>mctp1b</i>     | BE016395 | Down | None                                                                                                                                                                                                                |
| <i>anxa2a</i>     | AI883512 | Down | Goblet-like (-0.13)                                                                                                                                                                                                 |
| <i>opa3</i>       | BI979961 | Down | None                                                                                                                                                                                                                |
| <i>ppp1r3b</i>    | BM185380 | Down | Hepatocyte 2 (0.05)                                                                                                                                                                                                 |
| <i>sf3b4</i>      | AW116650 | Down | Endocrine 5 (-0.15)                                                                                                                                                                                                 |
| <i>map2k6</i>     | BI883251 | Down | EC3 (0.04), EC4 (0.01), Progenitor 3 (-0.81), Endocrine 3 (-0.37)                                                                                                                                                   |
| <i>mapre1a</i>    | AW170837 | Down | Goblet 1 (-0.12)                                                                                                                                                                                                    |
| <i>zpr1</i>       | BI888562 | Down | None                                                                                                                                                                                                                |
| <i>thop1</i>      | AI322178 | Down | EC4 (-0.13), Goblet 1 (-0.09)                                                                                                                                                                                       |
| <i>dnajc21</i>    | BI979115 | Down | None                                                                                                                                                                                                                |
| <i>hpd1</i>       | AW233637 | Down | None                                                                                                                                                                                                                |
| <i>sdf2l1</i>     | AI793850 | Down | Leukocyte 1 (-0.23), Leukocyte 2 (-0.10), Endocrine 1 (-0.21)                                                                                                                                                       |
| <i>nup93</i>      | U77595   | Down | Neuronal (-0.34)                                                                                                                                                                                                    |
| <i>zgc:165423</i> | AW202972 | Down | None                                                                                                                                                                                                                |
| <i>wars1</i>      | BI671005 | Down | None                                                                                                                                                                                                                |
| <i>bub3</i>       | AI667324 | Down | Progenitor 1 (-0.29)                                                                                                                                                                                                |
| <i>qpctla</i>     | BI672656 | Down | None                                                                                                                                                                                                                |
| <i>tmem183a</i>   | AF164440 | Down | None                                                                                                                                                                                                                |
| <i>pabpc1l</i>    | BG307551 | Down | None                                                                                                                                                                                                                |
| <i>hyou1</i>      | BI875665 | Down | EC3 (-0.07), EC4 (-0.13), Hepatocyte 1 (-0.17), Acinar 3 (-0.03)                                                                                                                                                    |
| <i>mpx</i>        | AF349034 | Down | Leukocyte 1 (-1.55)                                                                                                                                                                                                 |
| <i>tomm34</i>     | AI721507 | Down | Hepatocyte 1 (0.07)                                                                                                                                                                                                 |
| <i>smfn</i>       | BI673663 | Down | None                                                                                                                                                                                                                |
| <i>slc31a1</i>    | BM182319 | Down | Endocrine 3 (-0.20), EC3 (-0.19), EC4 (-0.25), EC5 (-0.10), LRE1 (-0.80)                                                                                                                                            |
| <i>canx</i>       | BI850032 | Down | Goblet 1 (-0.07), EC2 (0.06), Best4/Otop2 (-0.18), Hepatocyte 1 (-0.08), Hepatocyte 2 (0.01), Vascular smooth muscle (-0.13), Epidermis 3 (-0.05), Progenitor 0 (-0.06), Progenitor 1 (-0.67), Progenitor 2 (-0.29) |
| <i>pdip5</i>      | AF387900 | Down | None                                                                                                                                                                                                                |
| <i>actr2a</i>     | AW154456 | Down | Leukocytes 1 (-0.23), Vascular Endothelial (0.07)                                                                                                                                                                   |
| <i>tmed9</i>      | BI890897 | Down | Epidermis 3 (-0.11), Endocrine 2 (0.33)                                                                                                                                                                             |
| <i>hspd1</i>      | BG985703 | Down | Progenitor 1 (-0.43), EC4 (-0.10), Hepatocyte 1 (0.27), Hepatocyte 2 (0.30), Acinar 3 (-0.08)                                                                                                                       |
| <i>psma5</i>      | BI885253 | Down | Goblet 1 (-0.07), EC2 (0.07), LRE2 (-0.59), Acinar 3 (-0.01), Leukocyte 2 (-0.16)                                                                                                                                   |
| <i>sri</i>        | BM102105 | Down | EC2 (0.08), EC3 (0.08), EC5 (0.19), Mesen 2 (-0.19), Epidermis 2 (0.22), Endocrine 4 (-0.73), Goblet 1 (-0.15)                                                                                                      |
| <i>pigs</i>       | BM104152 | Down | None                                                                                                                                                                                                                |
| <i>exosc6</i>     | AW078163 | Down | None                                                                                                                                                                                                                |
| <i>hspa4a</i>     | AW116618 | Down | EC4 (-0.11), LRE2 (-0.79), Best4/Otop2 (0.33), Mesen 1 (0.26), Hepatocyte 1 (0.37), Hepatocyte 2 (0.27), Acinar 3 (-0.02), Epidermis 1 (0.15), Epidermis 2 (0.02), Progenitor 2 (-0.38)                             |

|                 |          |      |                                                                                                                                                                                                                                                          |
|-----------------|----------|------|----------------------------------------------------------------------------------------------------------------------------------------------------------------------------------------------------------------------------------------------------------|
| <i>slc16a6b</i> | AW421040 | Down | None                                                                                                                                                                                                                                                     |
| <i>pole3</i>    | BI672025 | Down | Progenitor 0 (0.19)                                                                                                                                                                                                                                      |
| <i>pfdn2</i>    | AI558431 | Down | EC3 (-0.05), Leukocyte 2 (-0.13)                                                                                                                                                                                                                         |
| <i>bloc1s2</i>  | BI867791 | Both | Leukocyte 2 (-0.11)                                                                                                                                                                                                                                      |
| <i>snrpd1</i>   | BI475794 | Down | Epidermis 2 (0.26), Progenitor 0 (-0.16), Progenitor 3 (0.53), Endocrine 2 (-0.20), Goblet 1 (-0.12), EC4 (-0.08), Leukocyte 2 (-0.38)                                                                                                                   |
| <i>hsp90b1</i>  | AW116284 | Down | Endocrine 4 (0.51), EC2 (0.04), LRE2 (-0.65), Mesen 2 (-0.09), Neuronal (-0.62), Hepatocyte 1 (-0.16), Vascular smooth muscle (-0.28)                                                                                                                    |
| <i>mydgf</i>    | BI889079 | Down | Leukocyte 2 (-0.11), EC3 (0.02), Hepatocyte 1 (-0.02)                                                                                                                                                                                                    |
| <i>nucks1a</i>  | AI641022 | Down | Progenitor 2 (-0.20)                                                                                                                                                                                                                                     |
| <i>ehd1b</i>    | AW175460 | Down | Vascular Endothelial (-0.30), Leukocyte 1 (-0.25), Epidermis 2 (-0.20), Progenitor 2 (-0.22)                                                                                                                                                             |
| <i>gpx1b</i>    | AW232570 | Down | Hepatocyte 1 (0.08), Hepatocyte 2 (0.02), Acinar 1 (-0.47), Progenitor 0 (-0.41), Progenitor 2 (-0.24), Endocrine 4 (-0.36), Endocrine 5 (-0.82), Goblet 1 (-0.48), Goblet-like (-0.72), EC1 (-1.03), EC2 (-0.68), EC3 (-0.85), EC4 (-0.78), EC5 (-0.67) |
| <i>snrpe</i>    | BM184694 | Down | Hepatocyte 1 (0.07), Hepatocyte 2 (0.16), Goblet 1 (-0.09), EC5 (-0.20), Mesen 1 (0.26), Mesen 3 (0.58)                                                                                                                                                  |
| <i>psmb3</i>    | BI891976 | Down | Acinar 3 (-0.01), Goblet 1 (-0.11), LRE2 (-0.44), Hepatocyte 1 (-0.05)                                                                                                                                                                                   |
| <i>mcm6</i>     | BI890108 | Down | Epidermis 2 (0.35)                                                                                                                                                                                                                                       |
| <i>xpo1a</i>    | BI672394 | Down | None                                                                                                                                                                                                                                                     |
| <i>dctpp1</i>   | BM182031 | Down | None                                                                                                                                                                                                                                                     |
| <i>parp3</i>    | BM183983 | Down | None                                                                                                                                                                                                                                                     |
| <i>mfap4.1</i>  | BF717537 | Down | None                                                                                                                                                                                                                                                     |
| <i>usp14</i>    | BI878085 | Down | Leukocytes 2 (-0.10)                                                                                                                                                                                                                                     |
| <i>c3a.2</i>    | AF047414 | Down | None                                                                                                                                                                                                                                                     |
| <i>dnajb11</i>  | AW344134 | Down | Acinar 3 (-0.04), Tuft-like (-0.38), Best4/Otop2 (-0.06)                                                                                                                                                                                                 |
| <i>gdf5</i>     | Y12005   | Down | None                                                                                                                                                                                                                                                     |
| <i>calr3a</i>   | AF195882 | Down | Vascular smooth muscle (-0.11), Epidermis 3 (-0.21), Goblet 1 (-0.32), EC2 (0.04), EC4 (-0.09), EC5 (-0.18), Hepatocyte 1 (-0.15), Hepatocyte 2 (-0.03), Hepatocyte 3 (-0.11)                                                                            |
| <i>sec11a</i>   | AW117147 | Down | Goblet 1 (-0.11), EC3 (0.04), Hepatocyte 1 (-0.11), Acinar 3 (-0.14)                                                                                                                                                                                     |
| <i>mcm2</i>     | AW115626 | Down | None                                                                                                                                                                                                                                                     |
| <i>lsm6</i>     | BM080950 | Down | Goblet 1 (-0.10), Hepatocyte 1 (0.04), Hepatocyte 2 (0.04), Acinar 3 (-0.02), Leukocyte 1 (0.20), Epidermis 1 (0.33)                                                                                                                                     |
| <i>c4b</i>      | BI672168 | Down | Hepatocyte 1 (0.20), Hepatocyte 2 (0.16)                                                                                                                                                                                                                 |
| <i>ube2na</i>   | BI877866 | Down | Acinar 3 (-0.02), Epidermis 2 (0.18), Endocrine 0 (0.32), Endocrine 3 (0.49), EC2 (0.04), LRE1 (-0.28)                                                                                                                                                   |
| <i>hmga1a</i>   | BI704288 | Down | Mesen 1 (0.39), Mesen 2 (-0.09), Hepatocyte 2 (0.04), Acinar 3 (-0.03), Epidermis 2 (0.50), EC2 (0.08), EC3 (0.03)                                                                                                                                       |
| <i>creld2</i>   | AI558398 | Down | None                                                                                                                                                                                                                                                     |

|                          |          |      |                                                                                                                                                                                                                                                                                                                       |
|--------------------------|----------|------|-----------------------------------------------------------------------------------------------------------------------------------------------------------------------------------------------------------------------------------------------------------------------------------------------------------------------|
| <i>dynll1</i>            | AW019725 | Down | Acinar 3 (-0.03), Vascular smooth muscle (-0.15), Endocrine 4 (-0.88), Goblet 1 (-0.22), EC2 (0.05), LRE2 (-0.94), Mesen 1 (0.28), Mesen2 (-0.16)                                                                                                                                                                     |
| <i>cfh</i>               | BF717453 | Down | Endocrine 2 (0.19), Hep1 (-0.22)                                                                                                                                                                                                                                                                                      |
| <i>ostc</i>              | AI641585 | Down | Goblet 1 (-0.18), EC2 (0.01), EC5 (-0.16), Acinar 3 (-0.01)                                                                                                                                                                                                                                                           |
| <i>smarca5</i>           | AW116374 | Down | None                                                                                                                                                                                                                                                                                                                  |
| <i>agr2</i>              | AW233227 | Down | LRE2 (-0.61), Progenitor 0 (-0.52), Endocrine 4 (-0.45), Goblet 1 (0.03)                                                                                                                                                                                                                                              |
| <i>ap1s1</i>             | BI889458 | Down | Best4/Otop2 (-0.12), Epidermis 3 (-0.17), Progenitor 2 (-0.16), Goblet 1 (-0.07), LRE1 (-0.22)                                                                                                                                                                                                                        |
| <i>manf</i>              | BM035598 | Down | Acinar 3 (0.08), Progenitor 0 (-0.24), LRE2 (-0.35)                                                                                                                                                                                                                                                                   |
| <i>sae1</i>              | BI886200 | Down | None                                                                                                                                                                                                                                                                                                                  |
| <i>hsd17b12b</i>         | AI558603 | Down | EC2 (0.01), EC3 (0.03)                                                                                                                                                                                                                                                                                                |
| <i>irg1l</i>             | AW567349 | Down | Endocrine 3 (-0.53), Goblet 1 (-1.27), Goblet 2 (-0.78)                                                                                                                                                                                                                                                               |
| <i>gale</i>              | BI882235 | Down | Goblet 1 (-0.04), Epidermis 1 (0.13)                                                                                                                                                                                                                                                                                  |
| <i>usp10</i>             | BM154897 | Down | EC4 (-0.11), Endocrine 2 (-0.32)                                                                                                                                                                                                                                                                                      |
| <i>hmgn2</i>             | AA605677 | Down | Mesen 2 (-0.14), Neuronal (-0.60), Vascular smooth muscle (-0.19), Leukocyte 2 (-0.25), Epidermis 2 (0.44), Endocrine 2 (-0.31), Goblet 1 (-0.15)                                                                                                                                                                     |
| <i>orc4</i>              | AA495437 | Down | None                                                                                                                                                                                                                                                                                                                  |
| <i>abracl</i>            | BI891069 | Down | Leukocyte 1 (-0.35), Epidermis 2 (-0.10), Epidermis 3 (-0.24), Goblet 1 (-0.06), EC3 (0.03), LRE2 (-0.46)                                                                                                                                                                                                             |
| <i>si:ch211-153b23.5</i> | AW184205 | Down | Leukocyte 2 (-0.19), Epidermis 3 (-0.27), Progenitor 0 (-0.54), Endocrine 1 (-0.37), Endocrine 4 (-0.54), Goblet 1 (-0.87), Goblet 2 (-0.65), Goblet-like (-1.18), EC1 (-0.98), EC2 (-0.39), EC3 (-0.49), EC4 (-1.04), EC5 (-0.34), LRE2 (-1.9), BO (-0.75), Hepatocyte 2 (-0.10), Acinar 2 (-0.24), Acinar 3 (-0.02) |
| <i>clca1</i>             | BG727476 | Down | Endocrine 0 (-0.25), Endocrine 5 (-0.40), EC1 (-0.56), EC2 (-0.46), EC3 (-0.66), EC4 (-0.53), EC5 (-0.20)                                                                                                                                                                                                             |
| <i>nansa</i>             | BI889549 | Down | EC3 (0.02)                                                                                                                                                                                                                                                                                                            |
| <i>cpox</i>              | AI974203 | Down | Best4/Otop2 (-0.16), Progenitor 2 (-0.22)                                                                                                                                                                                                                                                                             |
| <i>pdia4</i>             | AI721398 | Down | Hepatocyte 1 (-0.09), Acinar 3 (0.02), Epidermis 3 (-0.27), Progenitor 0 (-0.10), Endocrine 5 (-0.49), Goblet 1 (-0.09)                                                                                                                                                                                               |
| <i>mcm5</i>              | AW058902 | Down | None                                                                                                                                                                                                                                                                                                                  |
| <i>fdps</i>              | AI522427 | Down | LRE2 (-0.27)                                                                                                                                                                                                                                                                                                          |
| <i>kpna2</i>             | BI878593 | Down | None                                                                                                                                                                                                                                                                                                                  |
| <i>cyp2r1</i>            | BI896258 | Down | Hepatocyte 1 (-0.23), Hepatocyte 2 (-0.26)                                                                                                                                                                                                                                                                            |
| <i>uchl3</i>             | BM005021 | Down | Goblet 1 (-0.08)                                                                                                                                                                                                                                                                                                      |
| <i>hmgcs1</i>            | BI878811 | Down | None                                                                                                                                                                                                                                                                                                                  |
| <i>hpxa</i>              | AW115757 | Down | None                                                                                                                                                                                                                                                                                                                  |
| <i>hmgcs1</i>            | AI545224 | Down | None                                                                                                                                                                                                                                                                                                                  |
| <i>mcm3</i>              | BI889166 | Down | Leukocyte 2 (-0.17), Epidermis 2 (0.16), Progenitor 1 (-0.30)                                                                                                                                                                                                                                                         |
| <i>pcna</i>              | AF140608 | Down | Epidermis 1 (0.18), Epi2 (0.29), Mesen 1 (0.31)                                                                                                                                                                                                                                                                       |
| <i>gck</i>               | AI477585 | Down | None                                                                                                                                                                                                                                                                                                                  |
| <i>ifit15</i>            | AW018470 | Down | None                                                                                                                                                                                                                                                                                                                  |



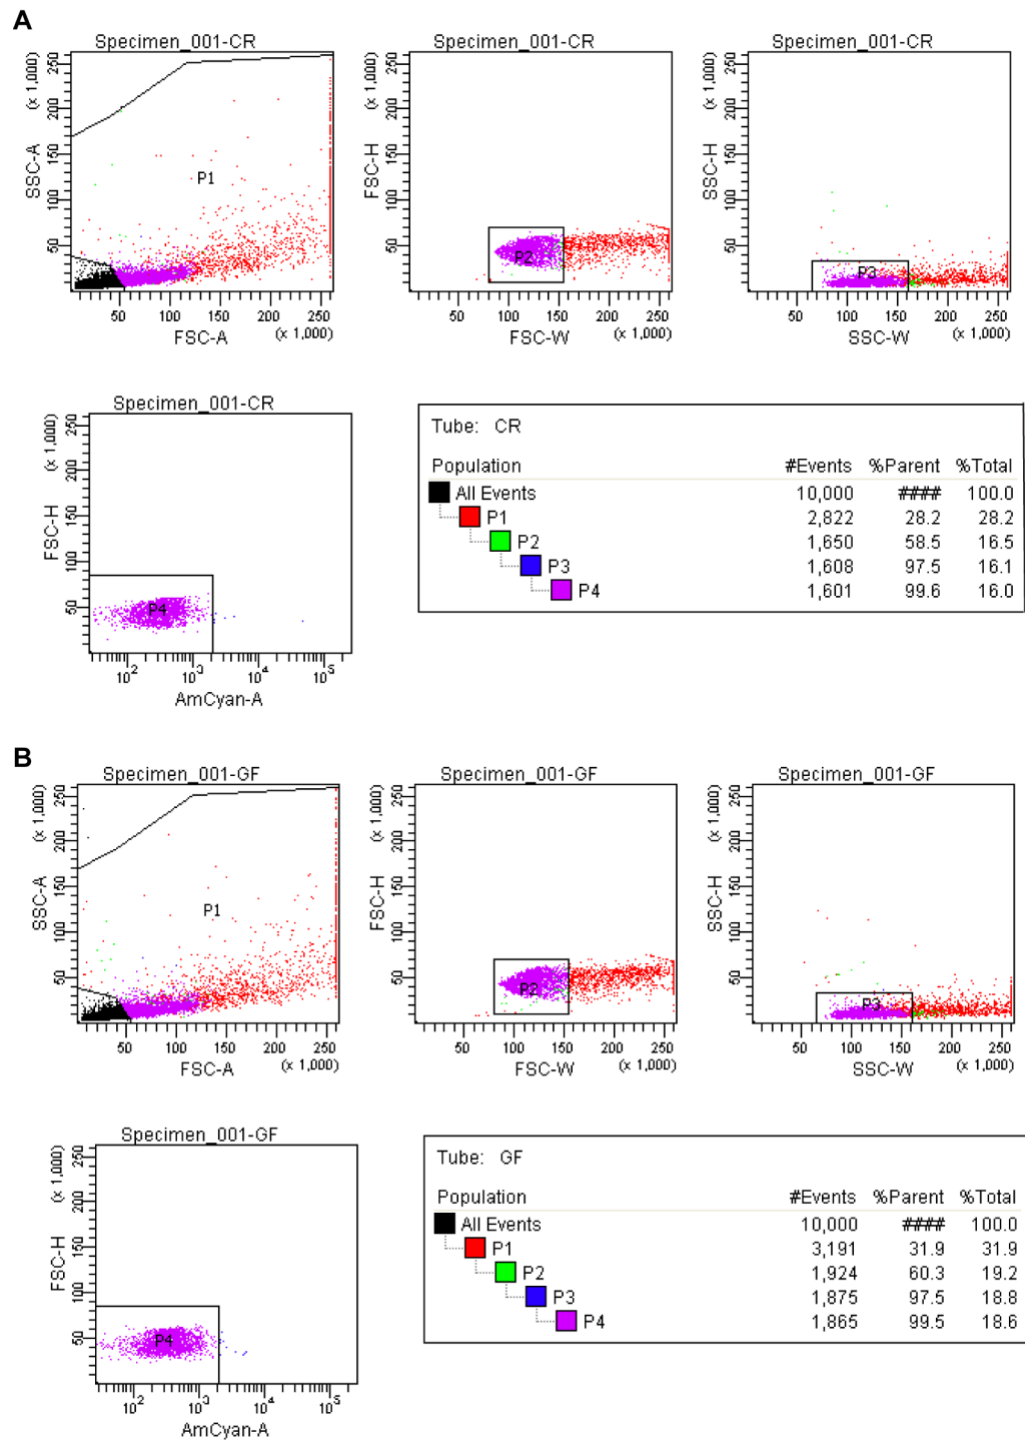

794

795 **Figure S1. Isolation of single cells via fluorescence activated cell sorting.** (A-B) Gating strategy for  
 796 isolating dissociated single intestinal cells from CV (A) and GF (B) fish for replicate 1 of the single cell  
 797 isolation protocol. Forward and side scatter were used to determine the single cell population, and  
 798 Zombie Aqua viability die was used to select live cells.  
 799

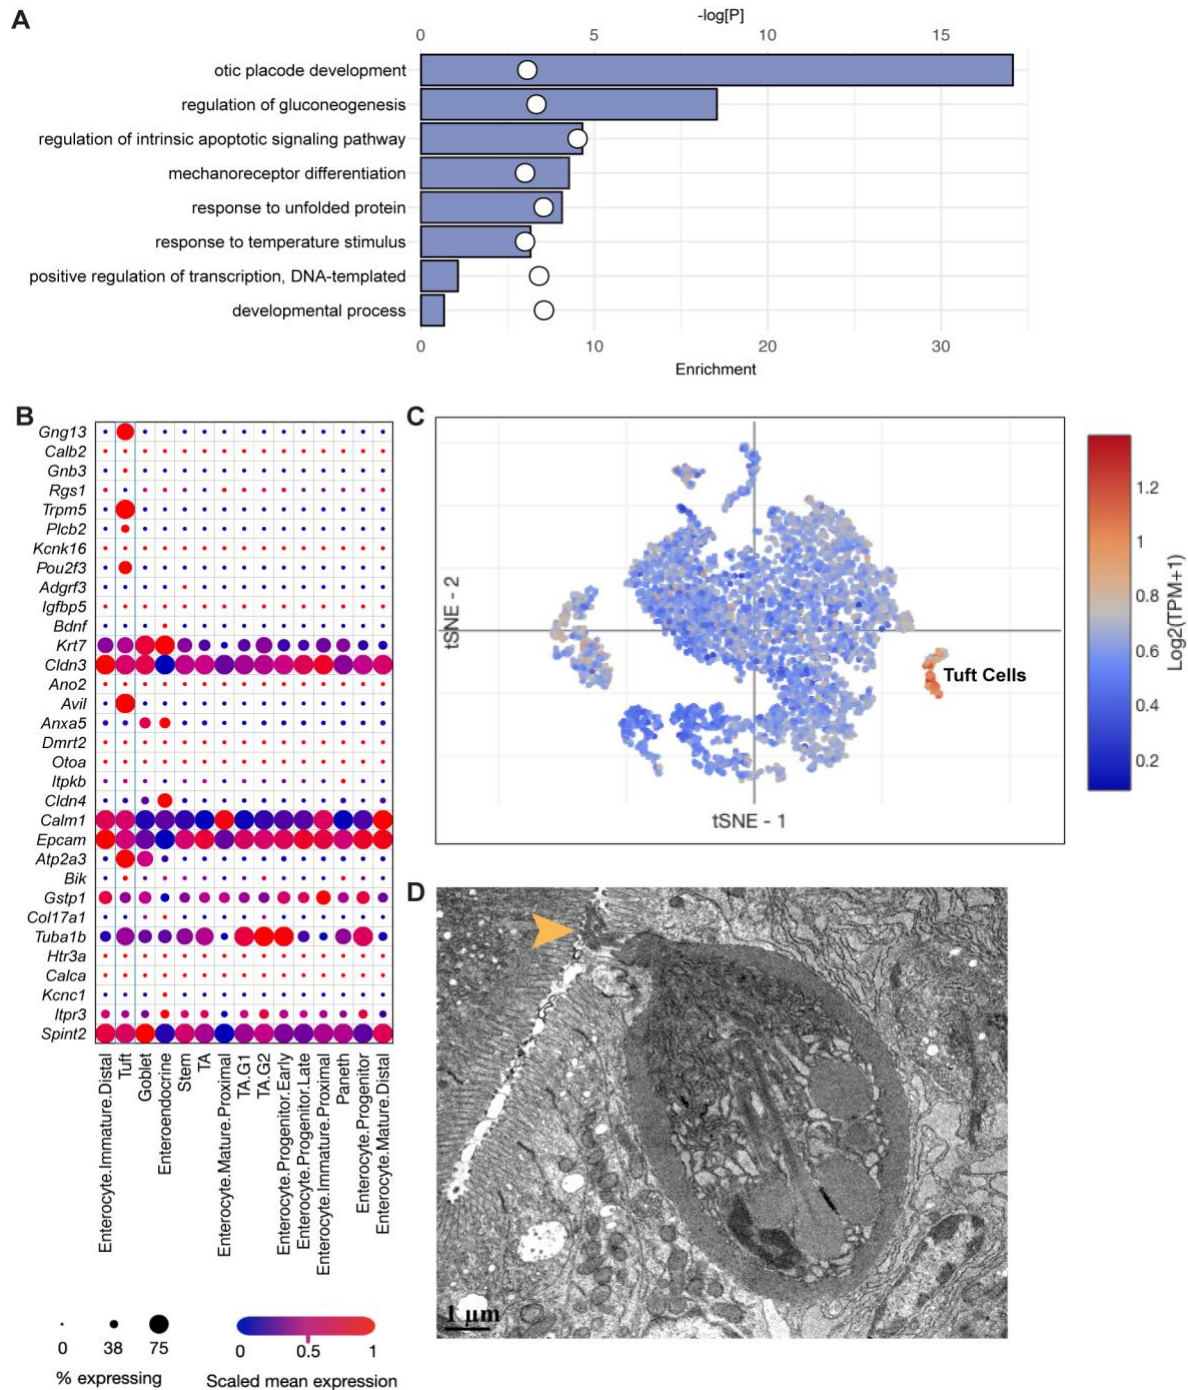

800

801

802 **Figure S2. Identification of tuft-like cells in the zebrafish intestinal epithelium.** (A) GO enrichment

803 analysis of tuft-like cells, based on tuft-like cell genetic markers from the conventional single-cell RNA

804 sequencing dataset. Top 8 GO terms are shown. Enrichment score is represented by bar length and p-

805 value is indicated with white circles. (B-C) Expression of mouse orthologues for the top 50 zebrafish tuft-

806 like cell marker genes in a single-cell RNA sequencing dataset of the mouse small intestinal epithelium

807 from Haber et al., 2017, generated using the Broad Single Cell Portal. 32/50 genes had orthologues that

808 were detected in the mouse small intestinal dataset. (B) Heatmap of mouse orthologue expression per

809 mouse intestinal epithelial cell type, colored by scaled mean expression, where the size of the dot  
810 indicates proportion of expressing cells per cell type. (C) TSNE plot of mouse small intestinal epithelial  
811 cells, showing mean expression ( $\text{Log}_2(\text{TPM}+1)$ ) of 32 tuft-like marker gene orthologues per cell.  
812 Enrichment is evident in the annotated tuft cell clusters. (D) Transmission electron micrograph of the adult  
813 zebrafish posterior intestinal epithelium. Yellow arrowhead points to an apical tuft protruding through  
814 the epithelial brush border.

815

816

817

818

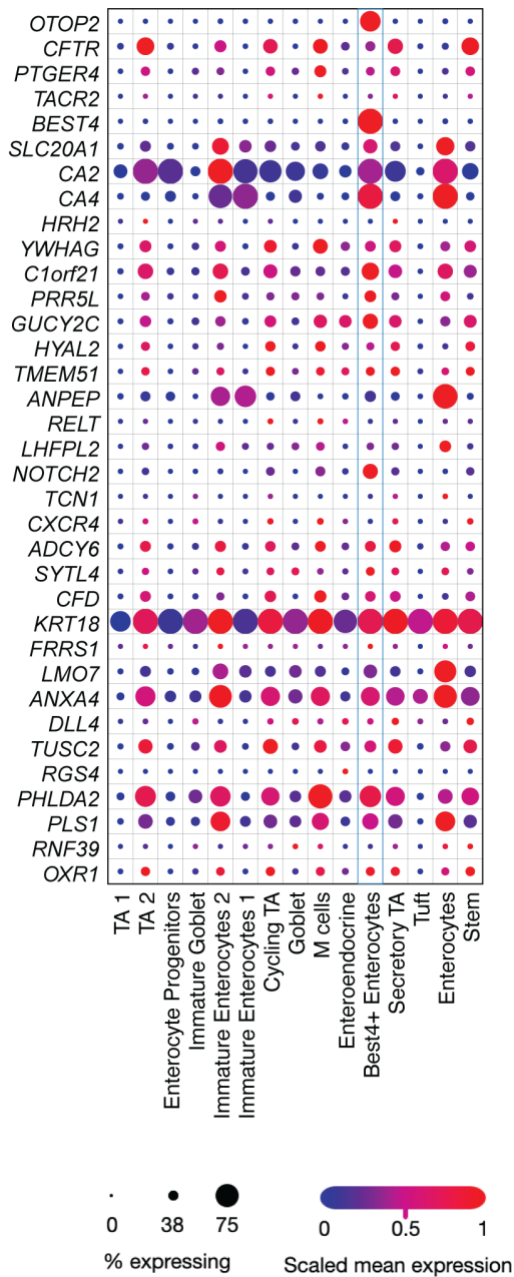

**Figure S3. Analysis of zebrafish Best/Otop2 cell expression markers in the human colonic epithelium.**

Expression of human orthologues for the top 50 zebrafish Best4/Otop2 cell marker genes in a single-cell RNA sequencing dataset of the human colonic epithelium from Smillie et al., 2019, generated using the Broad Single Cell Portal (accession SCP259). 35/50 genes had orthologues that were detected in the human colonic dataset. Heatmap of human orthologue expression per epithelial cell type is shown, colored by scaled mean expression, where the size of the dot indicates proportion of expressing cells per cell type.

828

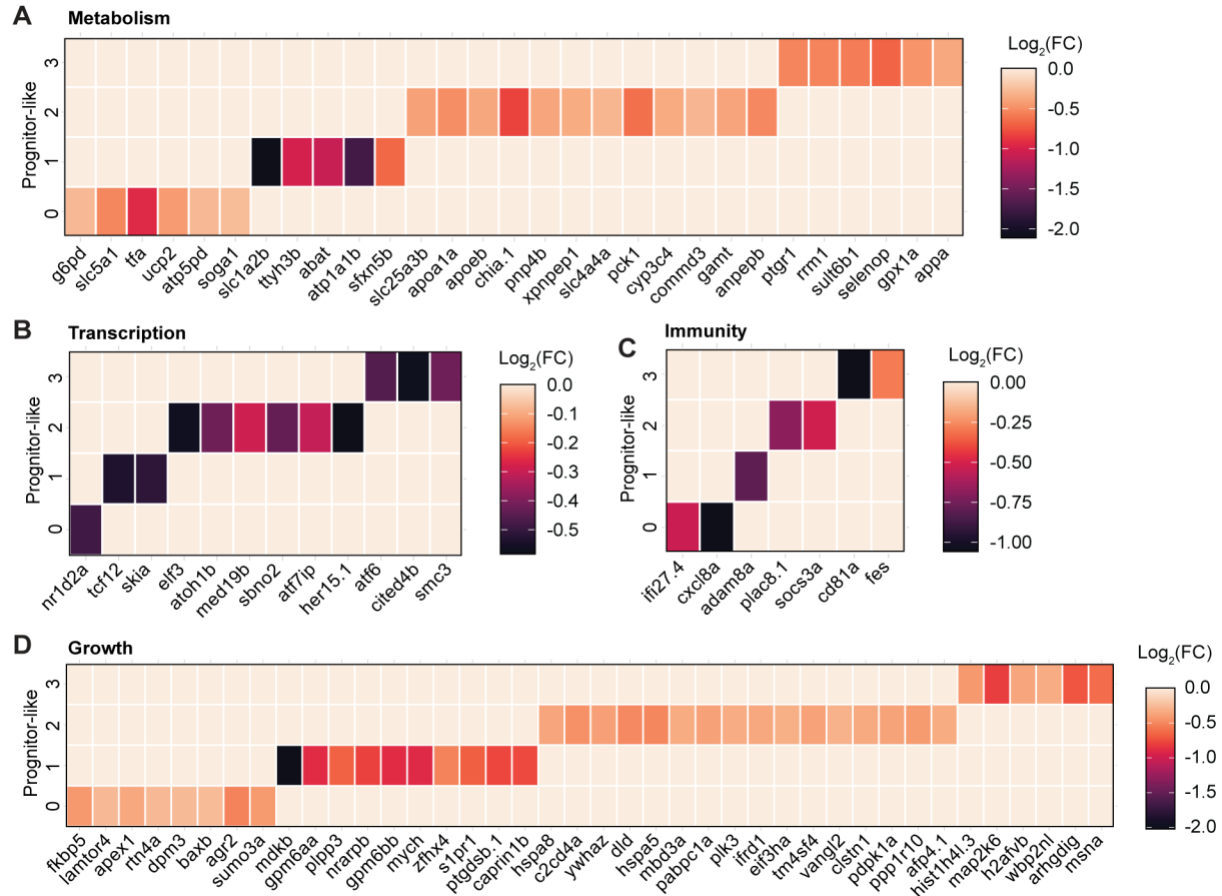

829

830 **Figure S4. Microbes stimulate specialized processes in progenitor-like cell subsets.** Heatmaps of  
 831 differentially expressed genes (GF vs. CV,  $p < 0.05$ ) involved in metabolism (A), transcription (B), immunity  
 832 (C) and growth (D), in progenitor-like subsets 0-3 (from Figure 1D-E), color coded according to  $\text{Log}_2(\text{FC})$ .  
 833 All non-zero value expression changes are significant ( $p < 0.05$ ) as determined with a non-parametric  
 834 Wilcoxon rank sum test.

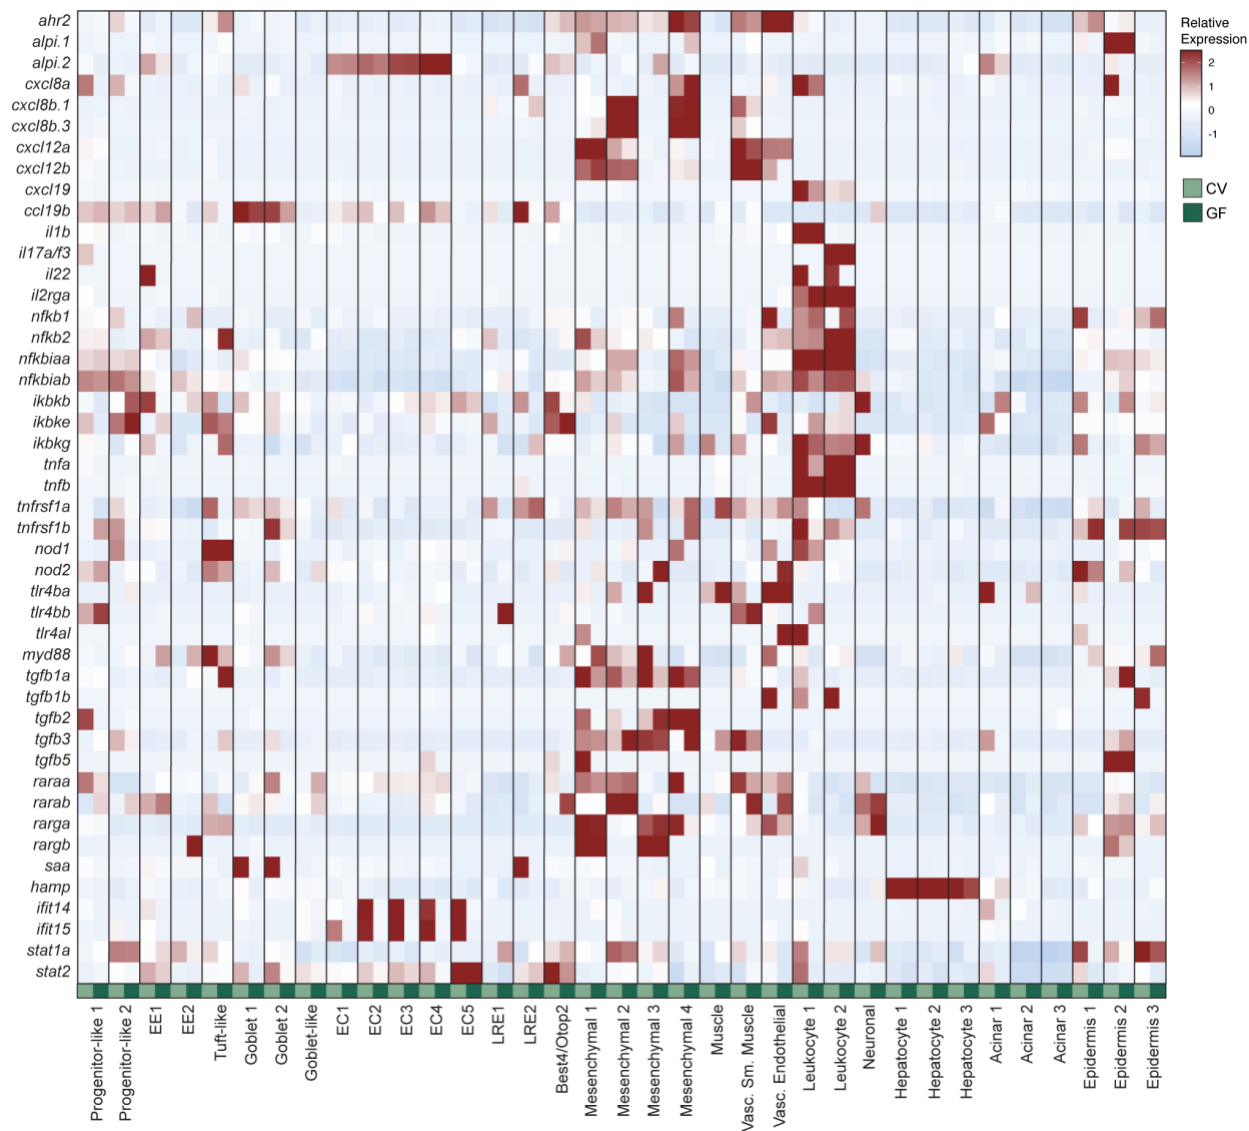

835

836 **Figure S5. Immune gene expression across conventional and germ-free cell populations.** Heatmap  
837 showing relative expression of a representative set of microbial sensors, NF- $\kappa$ B pathway components,  
838 cytokines and chemokines in CV and GF cell types. CV expression

839

840

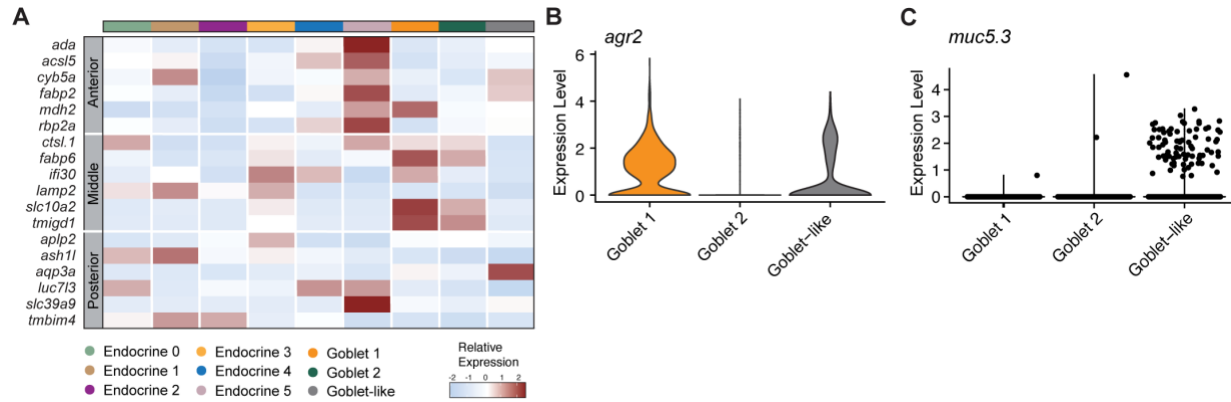

841

842 **Figure S6. Secretory cell regional specification and goblet cell characterization.** (A) Heatmap showing  
843 relative expression of established regional marker genes in each secretory cell type. (B-C) Violin plots for  
844 *agr2* (B) and *muc5.3* (C) expression in goblet and goblet-like clusters.  
845

846

847

848

849

850

851

852

853

854

855

856

857

858

859

860

861 **REFERENCES**

- 862 Abrams, J., Davuluri, G., Seiler, C., and Pack, M. (2012) Smooth muscle caldesmon modulates peristalsis  
863 in the wild type and non-innervated zebrafish intestine. *Neurogastroenterol Motil*, *24*, 288–299.
- 864 Aghaallaei, N., Gruhl, F., Schaefer, C.Q., Wernet, T., Weinhardt, V., Centanin, L., Loosli, F., Baumbach, T.,  
865 and Wittbrodt, J. (2016) Identification, visualization and clonal analysis of intestinal stem cells in fish.  
866 *Development*, *143*, 3470–3480.
- 867 Alvers, A.L., Ryan, S., Scherz, P.J., Huisken, J., and Bagnat, M. (2014) Single continuous lumen formation  
868 in the zebrafish gut is mediated by smoothed-dependent tissue remodeling. *Development*, *141*,  
869 1110–1119.
- 870 Arora, T., Akrami, R., Pais, R., Bergqvist, L., Johansson, B.R., Schwartz, T.W., Reimann, F., Gribble, F.M.,  
871 and Bäckhed, F. (2018) Microbial regulation of the L cell transcriptome. *Sci Rep*, *8*, 1207.
- 872 Bates, J.M., Akerlund, J., Mittge, E., and Guillemin, K. (2007) Intestinal alkaline phosphatase detoxifies  
873 lipopolysaccharide and prevents inflammation in zebrafish in response to the gut microbiota. *Cell Host*  
874 *Microbe*, *2*, 371–382.
- 875 Bates, J.M., Mittge, E., Kuhlman, J., Baden, K.N., Cheesman, S.E., and Guillemin, K. (2006) Distinct signals  
876 from the microbiota promote different aspects of zebrafish gut differentiation. *Dev Biol*, *297*, 374–386.
- 877 Belkaid, Y., and Hand, T.W. (2014) Role of the microbiota in immunity and inflammation. *Cell*, *157*, 121–  
878 141.
- 879 Brugman, S. (2016) The zebrafish as a model to study intestinal inflammation. *Dev Comp Immunol*, *64*,  
880 82–92.
- 881 Buchon, N., Broderick, N.A., Chakrabarti, S., and Lemaitre, B. (2009) Invasive and indigenous microbiota  
882 impact intestinal stem cell activity through multiple pathways in *Drosophila*. *Genes Dev*, *23*, 2333–2344.



883 Busslinger, G.A., Weusten, B.L.A., Bogte, A., Begthel, H., Brosens, L.A.A., and Clevers, H. (2021) Human  
884 gastrointestinal epithelia of the esophagus, stomach, and duodenum resolved at single-cell resolution.  
885 *Cell Rep*, *34*, 108819.

886 Butler, A., Hoffman, P., Smibert, P., Papalexi, E., and Satija, R. (2018) Integrating single-cell  
887 transcriptomic data across different conditions, technologies, and species. *Nat Biotechnol*, *36*, 411–420.

888 Cheesman, S.E., Neal, J.T., Mittge, E., Seredick, B.M., and Guillemin, K. (2011) Epithelial cell proliferation  
889 in the developing zebrafish intestine is regulated by the Wnt pathway and microbial signaling via Myd88.  
890 *Proc Natl Acad Sci U S A*, *108 Suppl 1*, 4570–4577.

891 Cordero, J.B., Stefanatos, R.K., Scopelliti, A., Vidal, M., and Sansom, O.J. (2012) Inducible progenitor-  
892 derived Wingless regulates adult midgut regeneration in *Drosophila*. *EMBO J*, *31*, 3901–3917.

893 Crosnier, C., Vargesson, N., Gschmeissner, S., Ariza-McNaughton, L., Morrison, A., and Lewis, J. (2005)  
894 Delta-Notch signalling controls commitment to a secretory fate in the zebrafish intestine. *Development*,  
895 *132*, 1093–1104.

896 Cvejic, A., Serbanovic-Canic, J., Stemple, D.L., and Ouwehand, W.H. (2011) The role of *meis1* in primitive  
897 and definitive hematopoiesis during zebrafish development. *Haematologica*, *96*, 190–198.

898 Davison, J.M., Lickwar, C.R., Song, L., Breton, G., Crawford, G.E., and Rawls, J.F. (2017) Microbiota  
899 regulate intestinal epithelial gene expression by suppressing the transcription factor Hepatocyte nuclear  
900 factor 4 alpha. *Genome Res*, *27*, 1195–1206.

901 Dudakov, J.A., Hanash, A.M., and van den Brink, M.R. (2015) Interleukin-22: immunobiology and  
902 pathology. *Annu Rev Immunol*, *33*, 747–785.

903 Eden, E., Navon, R., Steinfeld, I., Lipson, D., and Yakhini, Z. (2009) GOrilla: a tool for discovery and  
904 visualization of enriched GO terms in ranked gene lists. *BMC Bioinformatics*, *10*, 48.

905 Flasse, L.C., Stern, D.G., Pirson, J.L., Manfroid, I., Peers, B., and Voz, M.L. (2013) The bHLH transcription  
906 factor *Ascl1a* is essential for the specification of the intestinal secretory cells and mediates Notch  
907 signaling in the zebrafish intestine. *Dev Biol*, *376*, 187–197.

908 Flores, E.M., Nguyen, A.T., Odem, M.A., Eisenhoffer, G.T., and Krachler, A.M. (2020) The zebrafish as a  
909 model for gastrointestinal tract-microbe interactions. *Cell Microbiol*, *22*, e13152.

910 Flores, M.V., Crawford, K.C., Pullin, L.M., Hall, C.J., Crosier, K.E., and Crosier, P.S. (2010) Dual oxidase in  
911 the intestinal epithelium of zebrafish larvae has anti-bacterial properties. *Biochem Biophys Res*  
912 *Commun*, *400*, 164–168.

913 Flores, M.V., Hall, C.J., Davidson, A.J., Singh, P.P., Mahagaonkar, A.A., Zon, L.I., Crosier, K.E., and Crosier,  
914 P.S. (2008) Intestinal differentiation in zebrafish requires *Cdx1b*, a functional equivalent of mammalian  
915 *Cdx2*. *Gastroenterology*, *135*, 1665–1675.

916 Galindo-Villegas, J., García-Moreno, D., de Oliveira, S., Meseguer, J., and Mulero, V. (2012) Regulation of  
917 immunity and disease resistance by commensal microbes and chromatin modifications during zebrafish  
918 development. *Proc Natl Acad Sci U S A*, *109*, E2605–14.

919 Goi, M., and Childs, S.J. (2016) Patterning mechanisms of the sub-intestinal venous plexus in zebrafish.  
920 *Dev Biol*, *409*, 114–128.

921 Goldberg, R.F., Austen, W.G., Zhang, X., Munene, G., Mostafa, G., Biswas, S., McCormack, M., Eberlin,  
922 K.R., Nguyen, J.T., Tatlidede, H.S. et al. (2008) Intestinal alkaline phosphatase is a gut mucosal defense  
923 factor maintained by enteral nutrition. *Proc Natl Acad Sci U S A*, *105*, 3551–3556.

924 Gonçalves, A.F., Páscoa, I., Neves, J.V., Coimbra, J., Vijayan, M.M., Rodrigues, P., and Wilson, J.M. (2012)  
925 The inhibitory effect of environmental ammonia on *Danio rerio* LPS induced acute phase response. *Dev*  
926 *Comp Immunol*, *36*, 279–288.

927 Gribble, F.M., and Reimann, F. (2016) Enteroendocrine Cells: Chemosensors in the Intestinal Epithelium.  
928 *Annu Rev Physiol*, *78*, 277–299.

929 Grunwald, D.J., and Eisen, J.S. (2002) Headwaters of the zebrafish -- emergence of a new model  
930 vertebrate. *Nat Rev Genet*, *3*, 717–724.

931 Haber, A.L., Biton, M., Rogel, N., Herbst, R.H., Shekhar, K., Smillie, C., Burgin, G., Delorey, T.M., Howitt,  
932 M.R., Katz, Y. et al. (2017) A single-cell survey of the small intestinal epithelium. *Nature*, *551*, 333–339.

933 Haegebarth, A., and Clevers, H. (2009) Wnt signaling, *Igr5*, and stem cells in the intestine and skin. *Am J*  
934 *Pathol*, *174*, 715–721.

935 Hall, C.J., Boyle, R.H., Sun, X., Wicker, S.M., Misa, J.P., Krissansen, G.W., Print, C.G., Crosier, K.E., and  
936 Crosier, P.S. (2014) Epidermal cells help coordinate leukocyte migration during inflammation through  
937 fatty acid-fuelled matrix metalloproteinase production. *Nat Commun*, *5*, 3880.

938 Haramis, A.P., Hurlstone, A., van der Velden, Y., Begthel, H., van den Born, M., Offerhaus, G.J., and  
939 Clevers, H.C. (2006) Adenomatous polyposis coli-deficient zebrafish are susceptible to digestive tract  
940 neoplasia. *EMBO Rep*, *7*, 444–449.

941 He, C., and Chen, X. (2005) Transcription regulation of the *vegf* gene by the BMP/Smad pathway in the  
942 angioblast of zebrafish embryos. *Biochem Biophys Res Commun*, *329*, 324–330.

943 Heppert, J.K., Davison, J.M., Kelly, C., Mercado, G.P., Lickwar, C.R., and Rawls, J.F. (2021) Transcriptional  
944 programmes underlying cellular identity and microbial responsiveness in the intestinal epithelium. *Nat*  
945 *Rev Gastroenterol Hepatol*, *18*, 7–23.

946 Hernández, P.P., Strzelecka, P.M., Athanasiadis, E.I., Hall, D., Robalo, A.F., Collins, C.M., Boudinot, P.,  
947 Levraud, J.P., and Cvejic, A. (2018) Single-cell transcriptional analysis reveals ILC-like cells in zebrafish. *Sci*  
948 *Immunol*, *3*,

949 Hirose, K., Shimoda, N., and Kikuchi, Y. (2011) Expression patterns of *Igr4* and *Igr6* during zebrafish  
950 development. *Gene Expr Patterns*, *11*, 378–383.

951 Hooper, L.V., Wong, M.H., Thelin, A., Hansson, L., Falk, P.G., and Gordon, J.I. (2001) Molecular analysis of  
952 commensal host-microbial relationships in the intestine. *Science*, *291*, 881–884.

- 953 Hoover, B., Baena, V., Kaelberer, M.M., Getaneh, F., Chinchilla, S., and Bohórquez, D.V. (2017) The  
954 intestinal tuft cell nanostructure in 3D. *Sci Rep*, *7*, 1652.
- 955 Horng, J.L., Chao, P.L., Chen, P.Y., Shih, T.H., and Lin, L.Y. (2015) Aquaporin 1 Is Involved in Acid Secretion  
956 by Ionocytes of Zebrafish Embryos through Facilitating CO<sub>2</sub> Transport. *PLoS One*, *10*, e0136440.
- 957 Isogai, S., Horiguchi, M., and Weinstein, B.M. (2001) The vascular anatomy of the developing zebrafish:  
958 an atlas of embryonic and early larval development. *Dev Biol*, *230*, 278–301.
- 959 Jevtov, I., Samuelsson, T., Yao, G., Amsterdam, A., and Ribbeck, K. (2014) Zebrafish as a model to study  
960 live mucus physiology. *Sci Rep*, *4*, 6653.
- 961 Kanther, M., Sun, X., Mühlbauer, M., Mackey, L.C., Flynn, E.J., Bagnat, M., Jobin, C., and Rawls, J.F.  
962 (2011) Microbial colonization induces dynamic temporal and spatial patterns of NF- $\kappa$ B activation in the  
963 zebrafish digestive tract. *Gastroenterology*, *141*, 197–207.
- 964 Kao, R.M., Rurik, J.G., Farr, G.H., Dong, X.R., Majesky, M.W., and Maves, L. (2015) Pbx4 is Required for  
965 the Temporal Onset of Zebrafish Myocardial Differentiation. *J Dev Biol*, *3*, 93–111.
- 966 Katzenback, B.A. (2015) Antimicrobial Peptides as Mediators of Innate Immunity in Teleosts. *Biology*  
967 (Basel), *4*, 607–639.
- 968 Koch, B.E.V., Yang, S., Lamers, G., Stougaard, J., and Spaink, H.P. (2018) Intestinal microbiome adjusts  
969 the innate immune setpoint during colonization through negative regulation of MyD88. *Nat Commun*, *9*,  
970 4099.
- 971 Kwan, K.M., Fujimoto, E., Grabher, C., Mangum, B.D., Hardy, M.E., Campbell, D.S., Parant, J.M., Yost,  
972 H.J., Kanki, J.P., and Chien, C.B. (2007) The Tol2kit: a multisite gateway-based construction kit for Tol2  
973 transposon transgenesis constructs. *Dev Dyn*, *236*, 3088–3099.
- 974 Lavergne, A., Tarifeño-Saldivia, E., Pirson, J., Reuter, A.S., Flasse, L., Manfroid, I., Voz, M.L., and Peers, B.  
975 (2020) Pancreatic and intestinal endocrine cells in zebrafish share common transcriptomic signatures  
976 and regulatory programmes. *BMC Biol*, *18*, 109.

- 977 Le, H.T.M.D., Lie, K.K., Giroud-Argoud, J., Rønnestad, I., and Sæle, Ø. (2019) Effects of Cholecystokinin  
978 (CCK) on Gut Motility in the Stomachless Fish Ballan Wrasse (*Labrus bergylta*). *Front Neurosci*, *13*, 553.
- 979 Lee, W.C., Beebe, K., Sudmeier, L., and Micchelli, C.A. (2009) Adenomatous polyposis coli regulates  
980 *Drosophila* intestinal stem cell proliferation. *Development*, *136*, 2255–2264.
- 981 Lenard, A., Daetwyler, S., Betz, C., Ellertsdottir, E., Belting, H.G., Huisken, J., and Affolter, M. (2015)  
982 Endothelial cell self-fusion during vascular pruning. *PLoS Biol*, *13*, e1002126.
- 983 Li, J., Prochaska, M., Maney, L., and Wallace, K.N. (2020) Development and organization of the zebrafish  
984 intestinal epithelial stem cell niche. *Dev Dyn*, *249*, 76–87.
- 985 Lickwar, C.R., Camp, J.G., Weiser, M., Cocchiaro, J.L., Kingsley, D.M., Furey, T.S., Sheikh, S.Z., and Rawls,  
986 J.F. (2017) Genomic dissection of conserved transcriptional regulation in intestinal epithelial cells. *PLoS*  
987 *Biol*, *15*, e2002054.
- 988 Lin, G., Xu, N., and Xi, R. (2008) Paracrine Wntless signalling controls self-renewal of *Drosophila*  
989 intestinal stem cells. *Nature*, *455*, 1119–1123.
- 990 Liu, X., Cao, X., Wang, S., Ji, G., Zhang, S., and Li, H. (2017) Identification of Ly2 members as antimicrobial  
991 peptides from zebrafish *Danio rerio*. *Biosci Rep*, *37*,
- 992 López Nadal, A., Ikeda-Ohtsubo, W., Sipkema, D., Peggs, D., McGurk, C., Forlenza, M., Wiegertjes, G.F.,  
993 and Brugman, S. (2020) Feed, Microbiota, and Gut Immunity: Using the Zebrafish Model to Understand  
994 Fish Health. *Front Immunol*, *11*, 114.
- 995 Ma, D., Wei, Y., and Liu, F. (2013) Regulatory mechanisms of thymus and T cell development. *Dev Comp*  
996 *Immunol*, *39*, 91–102.
- 997 Macosko, E.Z., Basu, A., Satija, R., Nemesh, J., Shekhar, K., Goldman, M., Tirosh, I., Bialas, A.R., Kamitaki,  
998 N., Martersteck, E.M. et al. (2015) Highly Parallel Genome-wide Expression Profiling of Individual Cells  
999 Using Nanoliter Droplets. *Cell*, *161*, 1202–1214.

1000 Magalhaes, J.G., Rubino, S.J., Travassos, L.H., Le Bourhis, L., Duan, W., Sellge, G., Geddes, K., Geddes, K.,  
1001 Reardon, C., Lechmann, M. et al. (2011) Nucleotide oligomerization domain-containing proteins instruct  
1002 T cell helper type 2 immunity through stromal activation. *Proc Natl Acad Sci U S A*, *108*, 14896–14901.  
1003 Matthews, R.P., Lorent, K., Russo, P., and Pack, M. (2004) The zebrafish onecut gene *hnf-6* functions in  
1004 an evolutionarily conserved genetic pathway that regulates vertebrate biliary development. *Dev Biol*,  
1005 *274*, 245–259.  
1006 Melancon, E., Gomez De La Torre Canny, S., Sichel, S., Kelly, M., Wiles, T.J., Rawls, J.F., Eisen, J.S., and  
1007 Guillemin, K. (2017) Best practices for germ-free derivation and gnotobiotic zebrafish husbandry.  
1008 *Methods Cell Biol*, *138*, 61–100.  
1009 Mouillesseaux, K.P., Wiley, D.S., Saunders, L.M., Wylie, L.A., Kushner, E.J., Chong, D.C., Citrin, K.M.,  
1010 Barber, A.T., Park, Y., Kim, J.D. et al. (2016) Notch regulates BMP responsiveness and lateral branching in  
1011 vessel networks via SMAD6. *Nat Commun*, *7*, 13247.  
1012 Muncan, V., Faro, A., Haramis, A.P., Hurlstone, A.F., Wienholds, E., van Es, J., Korving, J., Begthel, H.,  
1013 Zivkovic, D., and Clevers, H. (2007) T-cell factor 4 (Tcf7l2) maintains proliferative compartments in  
1014 zebrafish intestine. *EMBO Rep*, *8*, 966–973.  
1015 Murdoch, C.C., Espenschied, S.T., Matty, M.A., Mueller, O., Tobin, D.M., and Rawls, J.F. (2019) Intestinal  
1016 Serum amyloid A suppresses systemic neutrophil activation and bactericidal activity in response to  
1017 microbiota colonization. *PLoS Pathog*, *15*, e1007381.  
1018 Ng, A.N., de Jong-Curtain, T.A., Mawdsley, D.J., White, S.J., Shin, J., Appel, B., Dong, P.D., Stainier, D.Y.,  
1019 and Heath, J.K. (2005) Formation of the digestive system in zebrafish: III. Intestinal epithelium  
1020 morphogenesis. *Dev Biol*, *286*, 114–135.  
1021 Nicenboim, J., Malkinson, G., Lupo, T., Asaf, L., Sela, Y., Mayseless, O., Gibbs-Bar, L., Senderovich, N.,  
1022 Hashimshony, T., Shin, M. et al. (2015) Lymphatic vessels arise from specialized angioblasts within a  
1023 venous niche. *Nature*, *522*, 56–61.

1024 Ouchi, T., Morimura, S., Dow, L.E., Miyoshi, H., and Udey, M.C. (2021) EpCAM (CD326) Regulates  
1025 Intestinal Epithelial Integrity and Stem Cells via Rho-Associated Kinase. *Cells*, *10*,  
1026 Parikh, K., Antanaviciute, A., Fawcner-Corbett, D., Jagielowicz, M., Aulicino, A., Lagerholm, C., Davis, S.,  
1027 Kinchen, J., Chen, H.H., Alham, N.K. et al. (2019) Colonic epithelial cell diversity in health and  
1028 inflammatory bowel disease. *Nature*, *567*, 49–55.  
1029 Park, J., Levic, D.S., Sumigray, K.D., Bagwell, J., Eroglu, O., Block, C.L., Eroglu, C., Barry, R., Lickwar, C.R.,  
1030 Rawls, J.F. et al. (2019) Lysosome-Rich Enterocytes Mediate Protein Absorption in the Vertebrate Gut.  
1031 *Dev Cell*, *51*, 7–20.e6.  
1032 Peron, M., Dinarello, A., Meneghetti, G., Martorano, L., Facchinello, N., Vettori, A., Licciardello, G., Tiso,  
1033 N., and Argenton, F. (2020) The stem-like Stat3-responsive cells of zebrafish intestine are Wnt/ $\beta$ -catenin  
1034 dependent. *Development*, *147*,  
1035 Pham, L.N., Kanther, M., Semova, I., and Rawls, J.F. (2008) Methods for generating and colonizing  
1036 gnotobiotic zebrafish. *Nat Protoc*, *3*, 1862–1875.  
1037 Rawls, J.F., Samuel, B.S., and Gordon, J.I. (2004) Gnotobiotic zebrafish reveal evolutionarily conserved  
1038 responses to the gut microbiota. *Proc Natl Acad Sci U S A*, *101*, 4596–4601.  
1039 Rehfeld, J.F. (2017) Cholecystokinin-From Local Gut Hormone to Ubiquitous Messenger. *Front*  
1040 *Endocrinol (Lausanne)*, *8*, 47.  
1041 Reikvam, D.H., Erofeev, A., Sandvik, A., Grcic, V., Jahnsen, F.L., Gaustad, P., McCoy, K.D., Macpherson,  
1042 A.J., Meza-Zepeda, L.A., and Johansen, F.E. (2011) Depletion of murine intestinal microbiota: effects on  
1043 gut mucosa and epithelial gene expression. *PLoS One*, *6*, e17996.  
1044 Reinhardt, C., Bergentall, M., Greiner, T.U., Schaffner, F., Ostergren-Lundén, G., Petersen, L.C., Ruf, W.,  
1045 and Bäckhed, F. (2012) Tissue factor and PAR1 promote microbiota-induced intestinal vascular  
1046 remodelling. *Nature*, *483*, 627–631.

1047 Roach, G., Heath Wallace, R., Cameron, A., Emrah Ozel, R., Hongay, C.F., Baral, R., Andreescu, S., and  
1048 Wallace, K.N. (2013) Loss of *ascl1a* prevents secretory cell differentiation within the zebrafish intestinal  
1049 epithelium resulting in a loss of distal intestinal motility. *Dev Biol*, 376, 171–186.

1050 Roeselers, G., Mittge, E.K., Stephens, W.Z., Parichy, D.M., Cavanaugh, C.M., Guillemin, K., and Rawls, J.F.  
1051 (2011) Evidence for a core gut microbiota in the zebrafish. *ISME J*, 5, 1595–1608.

1052 Schenkel, A.R., Mamdouh, Z., Chen, X., Liebman, R.M., and Muller, W.A. (2002) CD99 plays a major role  
1053 in the migration of monocytes through endothelial junctions. *Nat Immunol*, 3, 143–150.

1054 Schindelin, J., Arganda-Carreras, I., Frise, E., Kaynig, V., Longair, M., Pietzsch, T., Preibisch, S., Rueden, C.,  
1055 Saalfeld, S., Schmid, B. et al. (2012) Fiji: an open-source platform for biological-image analysis. *Nat*  
1056 *Methods*, 9, 676–682.

1057 Sekirov, I., Russell, S.L., Antunes, L.C., and Finlay, B.B. (2010) Gut microbiota in health and disease.  
1058 *Physiol Rev*, 90, 859–904.

1059 Smillie, C.S., Biton, M., Ordovas-Montanes, J., Sullivan, K.M., Burgin, G., Graham, D.B., Herbst, R.H.,  
1060 Rogel, N., Slyper, M., Waldman, J. et al. (2019) Intra- and Inter-cellular Rewiring of the Human Colon  
1061 during Ulcerative Colitis. *Cell*, 178, 714–730.e22.

1062 Song, S., Li, X., Geng, C., Li, Y., and Wang, C. (2020) Somatostatin stimulates colonic MUC2 expression  
1063 through SSTR5-Notch-Hes1 signaling pathway. *Biochem Biophys Res Commun*, 521, 1070–1076.

1064 Stappenbeck, T.S., Hooper, L.V., and Gordon, J.I. (2002) Developmental regulation of intestinal  
1065 angiogenesis by indigenous microbes via Paneth cells. *Proc Natl Acad Sci U S A*, 99, 15451–15455.

1066 Stephens, W.Z., Burns, A.R., Stagaman, K., Wong, S., Rawls, J.F., Guillemin, K., and Bohannan, B.J. (2016)  
1067 The composition of the zebrafish intestinal microbial community varies across development. *ISME J*, 10,  
1068 644–654.

1069 Supek, F., Bošnjak, M., Škunca, N., and Šmuc, T. (2011) REVIGO summarizes and visualizes long lists of  
1070 gene ontology terms. *PLoS One*, 6, e21800.



- 1071 Takeda, K., and Akira, S. (2005) Toll-like receptors in innate immunity. *Int Immunol*, *17*, 1–14.
- 1072 Talbot, K., Kwong, R.W., Gilmour, K.M., and Perry, S.F. (2015) The water channel aquaporin-1a1  
1073 facilitates movement of CO<sub>2</sub> and ammonia in zebrafish (*Danio rerio*) larvae. *J Exp Biol*, *218*, 3931–3940.
- 1074 Thakur, P.C., Davison, J.M., Stuckenholtz, C., Lu, L., and Bahary, N. (2014) Dysregulated  
1075 phosphatidylinositol signaling promotes endoplasmic-reticulum-stress-mediated intestinal mucosal  
1076 injury and inflammation in zebrafish. *Dis Model Mech*, *7*, 93–106.
- 1077 Tian, A., Benchabane, H., Wang, Z., and Ahmed, Y. (2016) Regulation of Stem Cell Proliferation and Cell  
1078 Fate Specification by Wingless/Wnt Signaling Gradients Enriched at Adult Intestinal Compartment  
1079 Boundaries. *PLoS Genet*, *12*, e1005822.
- 1080 Troll, J.V., Hamilton, M.K., Abel, M.L., Ganz, J., Bates, J.M., Stephens, W.Z., Melancon, E., van der Vaart,  
1081 M., Meijer, A.H., Distel, M. et al. (2018) Microbiota promote secretory cell determination in the  
1082 intestinal epithelium by modulating host Notch signaling. *Development*, *145*,
- 1083 van Soest, J.J., Stockhammer, O.W., Ordas, A., Bloemberg, G.V., Spaink, H.P., and Meijer, A.H. (2011)  
1084 Comparison of static immersion and intravenous injection systems for exposure of zebrafish embryos to  
1085 the natural pathogen *Edwardsiella tarda*. *BMC Immunol*, *12*, 58.
- 1086 Wallace, K.N., Akhter, S., Smith, E.M., Lorent, K., and Pack, M. (2005) Intestinal growth and  
1087 differentiation in zebrafish. *Mech Dev*, *122*, 157–173.
- 1088 Wang, M., Li, L., Guo, Q., Zhang, S., Ji, D., and Li, H. (2016) Identification and expression of a new Ly6  
1089 gene cluster in zebrafish *Danio rerio*, with implications of being involved in embryonic immunity. *Fish*  
1090 *Shellfish Immunol*, *54*, 230–240.
- 1091 Wang, Y., Kaiser, M.S., Larson, J.D., Nasevicius, A., Clark, K.J., Wadman, S.A., Roberg-Perez, S.E., Ekker,  
1092 S.C., Hackett, P.B., McGrail, M. et al. (2010a) Moesin1 and Ve-cadherin are required in endothelial cells  
1093 during in vivo tubulogenesis. *Development*, *137*, 3119–3128.

1094 Wang, Z., Du, J., Lam, S.H., Mathavan, S., Matsudaira, P., and Gong, Z. (2010b) Morphological and  
1095 molecular evidence for functional organization along the rostrocaudal axis of the adult zebrafish  
1096 intestine. *BMC Genomics*, *11*, 392.

1097 Wen, J., Mercado, G.P., Volland, A., Doden, H.L., Lickwar, C.R., Crooks, T., Kakiyama, G., Kelly, C.,  
1098 Cocchiaro, J.L., Ridlon, J.M. et al. (2021) Fxr signaling and microbial metabolism of bile salts in the  
1099 zebrafish intestine. *Sci Adv*, *7*,

1100 Westerfield, M. (2000) *The Zebrafish Book. A Guide for the Laboratory Use of Zebrafish (Danio rerio)*,  
1101 4th Edition. University of Oregon Press, Eugene.

1102 Wiles, T.J., Jemielita, M., Baker, R.P., Schlomann, B.H., Logan, S.L., Ganz, J., Melancon, E., Eisen, J.S.,  
1103 Guillemin, K., and Parthasarathy, R. (2016) Host Gut Motility Promotes Competitive Exclusion within a  
1104 Model Intestinal Microbiota. *PLoS Biol*, *14*, e1002517.

1105 Yang, J., Chan, C.Y., Jiang, B., Yu, X., Zhu, G.Z., Chen, Y., Barnard, J., and Mei, W. (2009) hnRNP I inhibits  
1106 Notch signaling and regulates intestinal epithelial homeostasis in the zebrafish. *PLoS Genet*, *5*,  
1107 e1000363.

1108 Yu, C., Jiang, S., Lu, J., Coughlin, C.C., Wang, Y., Swietlicki, E.A., Wang, L., Vietor, I., Huber, L.A., Cikes, D.  
1109 et al. (2010) Deletion of *Tis7* protects mice from high-fat diet-induced weight gain and blunts the  
1110 intestinal adaptive response postresection. *J Nutr*, *140*, 1907–1914.

1111 Zitvogel, L., Galluzzi, L., Viaud, S., Vétizou, M., Daillère, R., Merad, M., and Kroemer, G. (2015) Cancer  
1112 and the gut microbiota: an unexpected link. *Sci Transl Med*, *7*, 271ps1.

1113
